# Supplementary material
Source: PubMed Central journal article supplement (PMC4174930)
Supplement: 5d29c19c8c9ecda36b8ec092ba13a22a_genetics.114.166330-10.pdf [file 5d29c19c8c9ecda36b8ec092ba13a22a_genetics.114.166330-10.pdf]

**Table S2 Replicate 2 leaf width: mean, standard deviation, sample size, and significance groupings.**

| Chromosome<br>Arm | Leaf Width                      |                                  |                                 |                                 |
|-------------------|---------------------------------|----------------------------------|---------------------------------|---------------------------------|
|                   | E                               | F                                | H                               | O                               |
| 1S                | 10.19±1.59 <sup>a</sup><br>(14) | 10.29±1.16 <sup>a</sup><br>(20)  | 8.82±1.66 <sup>a</sup><br>(13)  | 4.35±0.92 <sup>b</sup><br>(6)   |
| 1L                | 11.14±1.67 <sup>a</sup><br>(12) | 11.58±1.06 <sup>a</sup><br>(10)  | 8.08±2.53 <sup>ab</sup><br>(4)  | 5.73±0.49 <sup>b</sup><br>(6)   |
| 3S                | 10.53±1.39 <sup>ab</sup><br>(9) | 10.35±1.55 <sup>b</sup><br>(15)  | 9.19±0.67 <sup>b</sup><br>(16)  | 12.11±0.83 <sup>a</sup><br>(11) |
| 3L                | 10.43±1.51 <sup>a</sup><br>(12) | 10.24±1.39 <sup>ab</sup><br>(13) | 8.37±0.67 <sup>b</sup><br>(12)  | 3.64±1.55 <sup>c</sup><br>(5)   |
| 4S                | 9.52±0.59 <sup>a</sup><br>(13)  | 10.04±0.57 <sup>a</sup><br>(11)  | 9.59±0.81 <sup>a</sup><br>(17)  | 9.5±0.93 <sup>a</sup><br>(10)   |
| 4L                | 11.32±0.88 <sup>a</sup><br>(12) | 10.66±1.23 <sup>a</sup><br>(14)  | 10.29±0.32 <sup>a</sup><br>(10) | 8.2±0.75 <sup>b</sup><br>(12)   |
| 5S                | 11.12±0.54 <sup>a</sup><br>(13) | 12.35±0.73 <sup>a</sup><br>(10)  | 12.08±1.03 <sup>a</sup><br>(13) | 5.3±1.13 <sup>b</sup><br>(13)   |
| 5L                | 11.13±0.69 <sup>a</sup><br>(12) | 11.13±0.77 <sup>a</sup><br>(12)  | 11±1.67 <sup>a</sup><br>(8)     | 5.33±1.02 <sup>b</sup><br>(6)   |
| 6L                | 10.12±0.62 <sup>a</sup><br>(11) | 10.75±0.75 <sup>a</sup><br>(8)   | 9.79±1.64 <sup>a</sup><br>(17)  | 7.68±0.81 <sup>b</sup><br>(16)  |
| 7L                | 9.22±1.44 <sup>a</sup><br>(9)   | 10.42±1.00 <sup>a</sup><br>(11)  | 9.27±0.38 <sup>a</sup><br>(11)  | 5.8±0.94 <sup>b</sup><br>(10)   |
| 8L                | 10.6±1.29 <sup>a</sup><br>(13)  | 10.49±1.74 <sup>ab</sup><br>(15) | 9.08±1.22 <sup>ab</sup><br>(12) | 9.19±1.18 <sup>b</sup><br>(8)   |
| 9S                | 11.61±0.69 <sup>a</sup><br>(9)  | 11.27±0.93 <sup>a</sup><br>(15)  | 10.93±1.02 <sup>a</sup><br>(14) | 9.58±0.98 <sup>a</sup><br>(15)  |
| 9L                | 11.25±0.76 <sup>a</sup><br>(6)  | 10.81±0.96 <sup>a</sup><br>(9)   | 10.63±0.91 <sup>a</sup><br>(12) | 4.42±0.69 <sup>b</sup><br>(17)  |
| 10L               | 9.79±1.52 <sup>a</sup><br>(12)  | 7.9±1.31 <sup>ab</sup><br>(14)   | 7.62±0.85 <sup>b</sup><br>(14)  | 9.03±1.15 <sup>ab</sup><br>(10) |

This table contains each group's mean ± group standard deviation and the sample size, n, of each group in parenthesis (n). In superscript, linked to the standard deviation are letters "a", "b" and "c" which indicate groups not significantly different from each other at the p≤0.05 level. Dosage designations are as follows: Euploid plants (no B-A present)-E; Euploid plants (B-A present and failure of nondisjunction)-F; Hyperploid plants-H; Hypoploid plants-O
