# Supplementary material
Source: PubMed Central journal article supplement (PMC4174930)
Supplement: 7bcff4e72250432a96a4dd92a1e40577_genetics.114.166330-6.pdf [file 7bcff4e72250432a96a4dd92a1e40577_genetics.114.166330-6.pdf]

**Table S6 Replicate 2 plant height: mean, standard deviation, sample size, and significance groupings.**

| Chromosome<br>Arm | Plant Height                      |                                   |                                    |                                   |
|-------------------|-----------------------------------|-----------------------------------|------------------------------------|-----------------------------------|
|                   | E                                 | F                                 | H                                  | O                                 |
| 1S                | 139.23±15.21 <sup>a</sup><br>(14) | 138.07±14.07 <sup>a</sup><br>(20) | 111.94±7.98 <sup>b</sup><br>(14)   | 92.86±12.22 <sup>b</sup><br>(7)   |
| 1L                | 160.87±12.49 <sup>a</sup><br>(12) | 159.58±10.1 <sup>a</sup><br>(13)  | 116.11±14.64 <sup>b</sup><br>(8)   | 76.9±6.87 <sup>c</sup><br>(6)     |
| 3S                | 153.22±8.14 <sup>a</sup><br>(9)   | 153.59±8.54 <sup>a</sup><br>(15)  | 157.16±9.29 <sup>a</sup><br>(16)   | 156.59±7.82 <sup>a</sup><br>(11)  |
| 3L                | 150.94±9.41 <sup>a</sup><br>(12)  | 145.8±13.61 <sup>a</sup><br>(13)  | 135.2±7.91 <sup>a</sup><br>(12)    | 63±18.65 <sup>b</sup><br>(5)      |
| 4S                | 135.09±9.97 <sup>a</sup><br>(14)  | 137.4±6.51 <sup>a</sup><br>(11)   | 141.78±7.34 <sup>a</sup><br>(17)   | 129.49±15.61 <sup>a</sup><br>(10) |
| 4L                | 139.52±8.23 <sup>a</sup><br>(12)  | 144.9±10.21 <sup>a</sup><br>(15)  | 141.16±5.56 <sup>a</sup><br>(10)   | 88.03±7.83 <sup>b</sup><br>(15)   |
| 5S                | 155.07±11 <sup>a</sup><br>(13)    | 128.66±9.94 <sup>a</sup><br>(10)  | 122.96±9.44 <sup>a</sup><br>(14)   | 95.24±12.14 <sup>b</sup><br>(13)  |
| 5L                | 140.63±11.07 <sup>a</sup><br>(12) | 149.19±8.2 <sup>a</sup><br>(12)   | 138±12.41 <sup>a</sup><br>(8)      | 88.8±9.93 <sup>b</sup><br>(6)     |
| 6L                | 127.56±8.59 <sup>a</sup><br>(11)  | 137.35±6.6 <sup>a</sup><br>(8)    | 118.22±13.26 <sup>a</sup><br>(17)  | 101.39±11.45 <sup>b</sup><br>(16) |
| 7L                | 145.26±7.51 <sup>a</sup><br>(9)   | 152.33±9.38 <sup>a</sup><br>(11)  | 152.35±7.88 <sup>a</sup><br>(11)   | 91.18±8.44 <sup>b</sup><br>(10)   |
| 8L                | 143.16±9.85 <sup>a</sup><br>(13)  | 147.24±9.65 <sup>a</sup><br>(16)  | 126.01±15.33 <sup>ab</sup><br>(13) | 113.17±9.5 <sup>b</sup><br>(10)   |
| 9S                | 153.13±8.44 <sup>a</sup><br>(9)   | 149.79±7.63 <sup>a</sup><br>(15)  | 155.04±6.55 <sup>a</sup><br>(14)   | 104.57±10.83 <sup>b</sup><br>(15) |
| 9L                | 113.17±17.51 <sup>ab</sup><br>(6) | 127.62±16.13 <sup>b</sup><br>(9)  | 100.31±13.4 <sup>a</sup><br>(12)   | 99.31±14.42 <sup>a</sup><br>(17)  |
| 10L               | 123.1±13.41 <sup>a</sup><br>(12)  | 117.84±7.84 <sup>a</sup><br>(14)  | 123.84±9.51 <sup>a</sup><br>(14)   | 76.85±6.53 <sup>b</sup><br>(10)   |

This table contains each group's mean ± group standard deviation and the sample size, n, of each group in parenthesis (n). In superscript, linked to the standard deviation are letters "a", "b" and "c" which indicate groups not significantly different from each other at the p≤0.05 level. Dosage designations are as follows: Euploid plants (no B-A present)-E; Euploid plants (B-A present and failure of nondisjunction)-F; Hyperploid plants-H; Hypoploid plants-O
