# Supplementary material
Source: PubMed Central journal article supplement (PMC4174930)
Supplement: 9fd33fc1ff287f3bdf9697f8a1d4bc2a_genetics.114.166330-2.pdf [file 9fd33fc1ff287f3bdf9697f8a1d4bc2a_genetics.114.166330-2.pdf]

**Table S8 Replicate 2 ear height: mean, standard deviation, sample size, and significance groupings.**

| Chromosome<br>Arm | Ear Height                        |                                  |                                   |                                 |
|-------------------|-----------------------------------|----------------------------------|-----------------------------------|---------------------------------|
|                   | E                                 | F                                | H                                 | O                               |
| 1S                | 77.5±11.37 <sup>a</sup><br>(14)   | 73.33±16.32 <sup>a</sup><br>(20) | 54.79±12.73 <sup>b</sup><br>(14)  | 24.7±12.37 <sup>c</sup><br>(7)  |
| 1L                | 87.13±11.97 <sup>a</sup><br>(12)  | 89.85±12.19 <sup>a</sup><br>(13) | 59.06±6.35 <sup>b</sup><br>(8)    | 34.3±5.48 <sup>c</sup><br>(6)   |
| 3S                | 78.87±9.46 <sup>a</sup><br>(9)    | 73.29±13.24 <sup>a</sup><br>(15) | 70.77±9.96 <sup>a</sup><br>(16)   | 87.98±9.07 <sup>a</sup><br>(11) |
| 3L                | 72.04±7.8 <sup>a</sup><br>(12)    | 69.17±7.49 <sup>a</sup><br>(13)  | 66.26±20.19 <sup>a</sup><br>(12)  | 17.42±7.17 <sup>b</sup><br>(5)  |
| 4S                | 58.57±16.79 <sup>a</sup><br>(14)  | 57.1±7.7 <sup>a</sup><br>(11)    | 53.4±3.78 <sup>a</sup><br>(17)    | 70.43±9.68 <sup>a</sup><br>(10) |
| 4L                | 57.47±3.94 <sup>a</sup><br>(12)   | 65.61±6.22 <sup>a</sup><br>(15)  | 61.65±6.79 <sup>a</sup><br>(10)   | 31.73±5.47 <sup>b</sup><br>(15) |
| 5S                | 67.65±10.62 <sup>a</sup><br>(13)  | 58.23±12.85 <sup>a</sup><br>(10) | 64.39±9.96 <sup>a</sup><br>(14)   | 32.45±7.96 <sup>b</sup><br>(13) |
| 5L                | 57.02±11.33 <sup>ab</sup><br>(12) | 67.03±5.17 <sup>a</sup><br>(12)  | 59.44±7.95 <sup>a</sup><br>(8)    | 36.63±4.31 <sup>b</sup><br>(6)  |
| 6L                | 58.25±10.34 <sup>ab</sup><br>(11) | 65.4±5.54 <sup>a</sup><br>(8)    | 53.08±11.03 <sup>ab</sup><br>(17) | 42.55±9.16 <sup>b</sup><br>(16) |
| 7L                | 71.06±5.97 <sup>a</sup><br>(9)    | 69.09±7.51 <sup>a</sup><br>(11)  | 84.72±7.52 <sup>a</sup><br>(11)   | 33.65±5.09 <sup>b</sup><br>(10) |
| 8L                | 65.74±6.46 <sup>a</sup><br>(13)   | 66.45±8.59 <sup>a</sup><br>(17)  | 53.36±8.31 <sup>a</sup><br>(13)   | 61.38±6.41 <sup>a</sup><br>(10) |
| 9S                | 70.34±8.52 <sup>a</sup><br>(9)    | 76.9±10.05 <sup>ab</sup><br>(15) | 80.49±9.69 <sup>b</sup><br>(14)   | 40.55±7.36 <sup>c</sup><br>(15) |
| 9L                | 53.35±9.2 <sup>ab</sup><br>(6)    | 59.9±8.79 <sup>a</sup><br>(9)    | 51.03±5.31 <sup>a</sup><br>(12)   | 33.84±8.91 <sup>b</sup><br>(17) |
| 10L               | 57.89±10.28 <sup>a</sup><br>(12)  | 53.76±11.19 <sup>a</sup><br>(14) | 57.92±6.55 <sup>a</sup><br>(14)   | 30.4±5.61 <sup>b</sup><br>(10)  |

This table contains each group's mean ± group standard deviation and the sample size, n, of each group in parenthesis (n). In superscript, linked to the standard deviation are letters "a", "b" and "c" which indicate groups not significantly different from each other at the p≤0.05 level. Dosage designations are as follows: Euploid plants (no B-A present)-E; Euploid plants (B-A present and failure of nondisjunction)-F; Hyperploid plants-H; Hypoploid plants-O
