# Supplementary material
Source: PubMed Central journal article supplement (PMC4174930)
Supplement: 13c1060331cfc5418d90afd22ca95143_genetics.114.166330-13.pdf [file 13c1060331cfc5418d90afd22ca95143_genetics.114.166330-13.pdf]

**Table S1 Replicate 1 leaf width: mean, standard deviation, sample size, and significance groupings.**

| Chromosome<br>Arm | Leaf Width                      |                                 |                                 |                                 |
|-------------------|---------------------------------|---------------------------------|---------------------------------|---------------------------------|
|                   | E                               | F                               | H                               | O                               |
| 1S                | 9.95±1.68 <sup>a</sup><br>(6)   | 10.38±0.61 <sup>a</sup><br>(12) | 8.76±1.67 <sup>a</sup><br>(17)  | 3.75±1.33 <sup>b</sup><br>(6)   |
| 1L                | 11.37±0.85 <sup>a</sup><br>(9)  | 9.94±1.4 <sup>b</sup><br>(13)   | 8.74±1.71 <sup>b</sup><br>(8)   | 4.1±0.92 <sup>c</sup><br>(4)    |
| 3S                | 9.81±1.71 <sup>a</sup><br>(8)   | 9.42±1.22 <sup>a</sup><br>(19)  | 9.03±0.68 <sup>a</sup><br>(16)  | 9.2±NA<br>(1)                   |
| 3L                | 9.91±1.6 <sup>ab</sup><br>(9)   | 9.71±1.78 <sup>a</sup><br>(11)  | 7.45±1.03 <sup>b</sup><br>(12)  | 4.7±1.32 <sup>c</sup><br>(7)    |
| 4S                | 9.74±0.65 <sup>a</sup><br>(12)  | 9.48±1.08 <sup>a</sup><br>(13)  | 9.27±0.77 <sup>a</sup><br>(13)  | 8.31±1.93 <sup>a</sup><br>(7)   |
| 4L                | 10.27±0.77 <sup>a</sup><br>(11) | 10.13±1.51 <sup>a</sup><br>(14) | 9.59±1.3 <sup>a</sup><br>(11)   | 6.7±1.6 <sup>b</sup><br>(9)     |
| 5S                | 10.9±0.68 <sup>a</sup><br>(12)  | 11.56±1.11 <sup>a</sup><br>(13) | 11.33±1.23 <sup>a</sup><br>(15) | 6.25±0.82 <sup>b</sup><br>(6)   |
| 5L                | 10.4±NA<br>(1)                  | 11.64±0.89 <sup>a</sup><br>(14) | 11.42±0.66 <sup>a</sup><br>(21) | 6.03±0.49 <sup>b</sup><br>(3)   |
| 6L                | 9.79±1.02 <sup>a</sup><br>(9)   | 10.38±0.98 <sup>a</sup><br>(9)  | 9.52±0.71 <sup>ab</sup><br>(11) | 7.03±0.84 <sup>b</sup><br>(15)  |
| 7L                | 9.41±1.11 <sup>a</sup><br>(8)   | 9.66±0.62 <sup>a</sup><br>(7)   | 8.73±0.45 <sup>a</sup><br>(11)  | 5.2±1.19 <sup>b</sup><br>(7)    |
| 8L                | 9.61±1.4 <sup>ab</sup><br>(7)   | 12.03±1.15 <sup>a</sup><br>(9)  | 8.36±1.26 <sup>b</sup><br>(15)  | 10.35±1.3 <sup>ab</sup><br>(11) |
| 9S                | 11.35±1.34 <sup>a</sup><br>(11) | 11.12±0.89 <sup>a</sup><br>(10) | 11±0.72 <sup>a</sup><br>(16)    | 10.77±0.39 <sup>a</sup><br>(7)  |
| 9L                | 11.29±0.5 <sup>a</sup><br>(9)   | 11.47±0.7 <sup>a</sup><br>(10)  | 10.39±1.29 <sup>a</sup><br>(17) | 4.92±0.44 <sup>b</sup><br>(11)  |
| 10L               | 10.42±1.29 <sup>a</sup><br>(13) | 9.6±1.3 <sup>a</sup><br>(12)    | 8.82±0.49 <sup>a</sup><br>(14)  | 9.82±1.09 <sup>a</sup><br>(5)   |

This table contains each group's mean ± group standard deviation and the sample size, n, of each group in parenthesis (n). In superscript, linked to the standard deviation are letters "a", "b" and "c" which indicate groups not significantly different from each other at the p≤0.05 level. Dosage designations are as follows: Euploid plants (no B-A present)-E; Euploid plants (B-A present and failure of nondisjunction)-F; Hyperploid plants-H; Hypoploid plants-O.

**Table S2 Replicate 2 leaf width: mean, standard deviation, sample size, and significance groupings.**

| Chromosome<br>Arm | Leaf Width                      |                                  |                                 |                                 |
|-------------------|---------------------------------|----------------------------------|---------------------------------|---------------------------------|
|                   | E                               | F                                | H                               | O                               |
| 1S                | 10.19±1.59 <sup>a</sup><br>(14) | 10.29±1.16 <sup>a</sup><br>(20)  | 8.82±1.66 <sup>a</sup><br>(13)  | 4.35±0.92 <sup>b</sup><br>(6)   |
| 1L                | 11.14±1.67 <sup>a</sup><br>(12) | 11.58±1.06 <sup>a</sup><br>(10)  | 8.08±2.53 <sup>ab</sup><br>(4)  | 5.73±0.49 <sup>b</sup><br>(6)   |
| 3S                | 10.53±1.39 <sup>ab</sup><br>(9) | 10.35±1.55 <sup>b</sup><br>(15)  | 9.19±0.67 <sup>b</sup><br>(16)  | 12.11±0.83 <sup>a</sup><br>(11) |
| 3L                | 10.43±1.51 <sup>a</sup><br>(12) | 10.24±1.39 <sup>ab</sup><br>(13) | 8.37±0.67 <sup>b</sup><br>(12)  | 3.64±1.55 <sup>c</sup><br>(5)   |
| 4S                | 9.52±0.59 <sup>a</sup><br>(13)  | 10.04±0.57 <sup>a</sup><br>(11)  | 9.59±0.81 <sup>a</sup><br>(17)  | 9.5±0.93 <sup>a</sup><br>(10)   |
| 4L                | 11.32±0.88 <sup>a</sup><br>(12) | 10.66±1.23 <sup>a</sup><br>(14)  | 10.29±0.32 <sup>a</sup><br>(10) | 8.2±0.75 <sup>b</sup><br>(12)   |
| 5S                | 11.12±0.54 <sup>a</sup><br>(13) | 12.35±0.73 <sup>a</sup><br>(10)  | 12.08±1.03 <sup>a</sup><br>(13) | 5.3±1.13 <sup>b</sup><br>(13)   |
| 5L                | 11.13±0.69 <sup>a</sup><br>(12) | 11.13±0.77 <sup>a</sup><br>(12)  | 11±1.67 <sup>a</sup><br>(8)     | 5.33±1.02 <sup>b</sup><br>(6)   |
| 6L                | 10.12±0.62 <sup>a</sup><br>(11) | 10.75±0.75 <sup>a</sup><br>(8)   | 9.79±1.64 <sup>a</sup><br>(17)  | 7.68±0.81 <sup>b</sup><br>(16)  |
| 7L                | 9.22±1.44 <sup>a</sup><br>(9)   | 10.42±1.00 <sup>a</sup><br>(11)  | 9.27±0.38 <sup>a</sup><br>(11)  | 5.8±0.94 <sup>b</sup><br>(10)   |
| 8L                | 10.6±1.29 <sup>a</sup><br>(13)  | 10.49±1.74 <sup>ab</sup><br>(15) | 9.08±1.22 <sup>ab</sup><br>(12) | 9.19±1.18 <sup>b</sup><br>(8)   |
| 9S                | 11.61±0.69 <sup>a</sup><br>(9)  | 11.27±0.93 <sup>a</sup><br>(15)  | 10.93±1.02 <sup>a</sup><br>(14) | 9.58±0.98 <sup>a</sup><br>(15)  |
| 9L                | 11.25±0.76 <sup>a</sup><br>(6)  | 10.81±0.96 <sup>a</sup><br>(9)   | 10.63±0.91 <sup>a</sup><br>(12) | 4.42±0.69 <sup>b</sup><br>(17)  |
| 10L               | 9.79±1.52 <sup>a</sup><br>(12)  | 7.9±1.31 <sup>ab</sup><br>(14)   | 7.62±0.85 <sup>b</sup><br>(14)  | 9.03±1.15 <sup>ab</sup><br>(10) |

This table contains each group's mean ± group standard deviation and the sample size, n, of each group in parenthesis (n). In superscript, linked to the standard deviation are letters "a", "b" and "c" which indicate groups not significantly different from each other at the p≤0.05 level. Dosage designations are as follows: Euploid plants (no B-A present)-E; Euploid plants (B-A present and failure of nondisjunction)-F; Hyperploid plants-H; Hypoploid plants-O

**Table S3 Replicate 1 leaf length: mean, standard deviation, sample size, and significance groupings.**

| Chromosome<br>Arm | Leaf Length                     |                                 |                                  |                                 |
|-------------------|---------------------------------|---------------------------------|----------------------------------|---------------------------------|
|                   | E                               | F                               | H                                | O                               |
| 1S                | 55.32±3.84 <sup>ab</sup><br>(6) | 60.73±3.5 <sup>a</sup><br>(10)  | 52.07±5.61 <sup>ab</sup><br>(17) | 38.7±8.16 <sup>b</sup><br>(6)   |
| 1L                | 62.38±2.2 <sup>a</sup><br>(8)   | 59.58±6.75 <sup>a</sup><br>(12) | 55.19±10.7 <sup>a</sup><br>(8)   | 33.45±6.68 <sup>b</sup><br>(4)  |
| 3S                | 59.14±5.71 <sup>a</sup><br>(7)  | 59.88±6.41 <sup>a</sup><br>(18) | 60.78±4.23 <sup>a</sup><br>(16)  | 46.2±NA<br>(1)                  |
| 3L                | 54.25±4.72 <sup>a</sup><br>(8)  | 54.4±5.58 <sup>a</sup><br>(10)  | 46.08±4.77 <sup>ab</sup><br>(12) | 37.04±6.5 <sup>b</sup><br>(7)   |
| 4S                | 54.87±5.16 <sup>a</sup><br>(12) | 56.38±3.77 <sup>a</sup><br>(12) | 56.07±5.54 <sup>a</sup><br>(13)  | 55.29 ±7.4 <sup>a</sup><br>(7)  |
| 4L                | 60.48±6.44 <sup>a</sup><br>(11) | 60.57±3.86 <sup>a</sup><br>(13) | 63.5±3.49 <sup>a</sup><br>(11)   | 47.75±5.78 <sup>b</sup><br>(8)  |
| 5S                | 57.96±5.45 <sup>a</sup><br>(12) | 58.29±6.97 <sup>a</sup><br>(13) | 58.57±4.5 <sup>a</sup><br>(15)   | 51.77±4.54 <sup>a</sup><br>(6)  |
| 5L                | 55.5±NA<br>(1)                  | 58.79±4.7 <sup>a</sup><br>(14)  | 55.59±5.5 <sup>a</sup><br>(15)   | 53.53±3.61 <sup>a</sup><br>(3)  |
| 6L                | 53.09±4.48 <sup>a</sup><br>(9)  | 47.84±3.05 <sup>a</sup><br>(8)  | 50.96±12.61 <sup>a</sup><br>(11) | 44.25±4.3 <sup>a</sup><br>(15)  |
| 7L                | 54.96±6.21 <sup>a</sup><br>(7)  | 54.53±3.53 <sup>a</sup><br>(7)  | 54.98±6.33 <sup>a</sup><br>(11)  | 36.17±5.79 <sup>b</sup><br>(7)  |
| 8L                | 54.67±7.45 <sup>ab</sup><br>(7) | 59.64±6.92 <sup>a</sup><br>(10) | 54.62±6.96 <sup>ab</sup><br>(15) | 47.85±8.38 <sup>b</sup><br>(15) |
| 9S                | 61.2±2.12 <sup>a</sup><br>(8)   | 57.33±7.56 <sup>a</sup><br>(9)  | 60.17±5.75 <sup>a</sup><br>(15)  | 48.53±5.77 <sup>a</sup><br>(6)  |
| 9L                | 58.51±6.92 <sup>a</sup><br>(9)  | 59.43±4.15 <sup>a</sup><br>(10) | 60.36±5.45 <sup>a</sup><br>(17)  | 54.51±2.09 <sup>a</sup><br>(11) |
| 10L               | 62.63±3.32 <sup>a</sup><br>(7)  | 59.43±2.43 <sup>a</sup><br>(10) | 62.06±2.4 <sup>a</sup><br>(14)   | 57.33±8.92 <sup>a</sup><br>(4)  |

This table contains each group's mean ± group standard deviation and the sample size, n, of each group in parenthesis (n). In superscript, linked to the standard deviation are letters "a", "b" and "c" which indicate groups not significantly different from each other at the p≤0.05 level. Dosage designations are as follows: Euploid plants (no B-A present)-E; Euploid plants (B-A present and failure of nondisjunction)-F; Hyperploid plants-H; Hypoploid plants-O.

**Table S4 Replicate 2 leaf length: mean, standard deviation, sample size, and significance groupings.**

| Chromosome<br>Arm | Leaf Length                      |                                  |                                 |                                 |
|-------------------|----------------------------------|----------------------------------|---------------------------------|---------------------------------|
|                   | E                                | F                                | H                               | O                               |
| 1S                | 62.64±5.12 <sup>a</sup><br>(10)  | 58.81±6.55 <sup>a</sup><br>(20)  | 55.52±6.47 <sup>a</sup><br>(13) | 51.53±6.91 <sup>a</sup><br>(7)  |
| 1L                | 58±4.42 <sup>ab</sup><br>(10)    | 60.16±6.58 <sup>a</sup><br>(10)  | 45.1±6.9 <sup>ab</sup><br>(5)   | 46.38±4.19 <sup>b</sup><br>(6)  |
| 3S                | 56.16±10.82 <sup>ab</sup><br>(9) | 61.72±8.13 <sup>ab</sup><br>(13) | 65.12±5.07 <sup>a</sup><br>(14) | 52.38±3.47 <sup>b</sup><br>(11) |
| 3L                | 61.82±5.37 <sup>a</sup><br>(10)  | 58.78±7.04 <sup>a</sup><br>(12)  | 53.78±5.33 <sup>a</sup><br>(12) | 47.1±14.16 <sup>a</sup><br>(5)  |
| 4S                | 60.53±3.54 <sup>a</sup><br>(14)  | 59.67±4.71 <sup>a</sup><br>(9)   | 62.74±3.97 <sup>a</sup><br>(14) | 55.71±2.96 <sup>a</sup><br>(10) |
| 4L                | 62.84±6.39 <sup>a</sup><br>(12)  | 61.19±7.28 <sup>a</sup><br>(15)  | 58.99±7.61 <sup>a</sup><br>(10) | 44.46±4.7 <sup>b</sup><br>(13)  |
| 5S                | 60.04±7.1 <sup>a</sup><br>(13)   | 56.66±2.46 <sup>a</sup><br>(10)  | 59.68±5.58 <sup>a</sup><br>(13) | 51.75±4.66 <sup>a</sup><br>(13) |
| 5L                | 60.46±5.7 <sup>a</sup><br>(12)   | 59.58±4.27 <sup>a</sup><br>(12)  | 56.84±8.55 <sup>a</sup><br>(8)  | 53.15±3.03 <sup>a</sup><br>(6)  |
| 6L                | 50.03±3.78 <sup>ab</sup><br>(10) | 54.84±6.55 <sup>a</sup><br>(5)   | 45.89±5.78 <sup>b</sup><br>(15) | 46.69±2.04 <sup>b</sup><br>(15) |
| 7L                | 54.1±2.7 <sup>a</sup><br>(8)     | 62.13±5.64 <sup>a</sup><br>(9)   | 54.73±4.82 <sup>a</sup><br>(7)  | 41.09±2.93 <sup>b</sup><br>(10) |
| 8L                | 61.37±7.69 <sup>a</sup><br>(12)  | 58.15±7.38 <sup>a</sup><br>(15)  | 59.14±5.7 <sup>a</sup><br>(13)  | 35.35±4.52 <sup>b</sup><br>(8)  |
| 9S                | 58.15±1.82 <sup>ab</sup><br>(4)  | 62.78±7.83 <sup>a</sup><br>(11)  | 62.92±5.08 <sup>a</sup><br>(11) | 50.22±5.61 <sup>b</sup><br>(12) |
| 9L                | 60.3±3.01 <sup>a</sup><br>(4)    | 61.13±5.1 <sup>a</sup><br>(8)    | 62.02±4.52 <sup>a</sup><br>(11) | 44.53±5.11 <sup>b</sup><br>(17) |
| 10L               | 53.61±4.25 <sup>a</sup><br>(9)   | 50.92±3.09 <sup>a</sup><br>(12)  | 50.57±6.03 <sup>a</sup><br>(10) | 53.76±3.47 <sup>a</sup><br>(10) |

This table contains each group's mean ± group standard deviation and the sample size, n, of each group in parenthesis (n). In superscript, linked to the standard deviation are letters "a", "b" and "c" which indicate groups not significantly different from each other at the p≤0.05 level. Dosage designations are as follows: Euploid plants (no B-A present)-E; Euploid plants (B-A present and failure of nondisjunction)-F; Hyperploid plants-H; Hypoploid plants-O

**Table S5 Replicate 1 plant height: mean, standard deviation, sample size, and significance groupings.**

| Chromosome<br>Arm | Plant Height                      |                                    |                                    |                                    |
|-------------------|-----------------------------------|------------------------------------|------------------------------------|------------------------------------|
|                   | E                                 | F                                  | H                                  | O                                  |
| 1S                | 124.83±15.15 <sup>a</sup><br>(7)  | 138.45±10.24 <sup>a</sup><br>(12)  | 102.34±16.02 <sup>a</sup><br>(17)  | 64.52±15.82 <sup>b</sup><br>(6)    |
| 1L                | 143.7±3.65 <sup>a</sup><br>(9)    | 139.47±9.78 <sup>a</sup><br>(14)   | 106.82±11.75 <sup>b</sup><br>(10)  | 45.48±9.74 <sup>c</sup><br>(4)     |
| 3S                | 138.89±17.79 <sup>a</sup><br>(8)  | 134.08±9.85 <sup>a</sup><br>(19)   | 143.04±6.98 <sup>a</sup><br>(16)   | 118.4±NA<br>(1)                    |
| 3L                | 124.74±11.26 <sup>a</sup><br>(9)  | 132.01±15.19 <sup>a</sup><br>(11)  | 113.92±14.11 <sup>a</sup><br>(12)  | 60.7±15.03 <sup>b</sup><br>(7)     |
| 4S                | 134.91±13.27 <sup>a</sup><br>(12) | 127.16±10.96 <sup>a</sup><br>(13)  | 131.55±7.24 <sup>a</sup><br>(13)   | 113.71±15.56 <sup>a</sup><br>(7)   |
| 4L                | 131.11±13.18 <sup>a</sup><br>(11) | 137.34±14.48 <sup>a</sup><br>(14)  | 141.69±11.32 <sup>a</sup><br>(11)  | 82.82±14.75 <sup>b</sup><br>(9)    |
| 5S                | 156.18±7.34 <sup>a</sup><br>(14)  | 133.89±15.43 <sup>b</sup><br>(13)  | 115.24±7.17 <sup>b</sup><br>(16)   | 98.65±8.12 <sup>c</sup><br>(6)     |
| 5L                | 132.4±NA<br>(1)                   | 129.9±14.49 <sup>a</sup><br>(14)   | 126.16±7.52 <sup>a</sup><br>(21)   | 95.23±1.58 <sup>a</sup><br>(3)     |
| 6L                | 133.38±6.46 <sup>a</sup><br>(9)   | 130.14±7.76 <sup>a</sup><br>(9)    | 123.43±8.29 <sup>a</sup><br>(11)   | 85.53±14.69 <sup>b</sup><br>(15)   |
| 7L                | 134.61±15.27 <sup>a</sup><br>(8)  | 134.15±9.71 <sup>a</sup><br>(8)    | 131.99±12.31 <sup>a</sup><br>(11)  | 65.5±22.36 <sup>b</sup><br>(7)     |
| 8L                | 141.91±8.66 <sup>ab</sup><br>(7)  | 155.56±7.76 <sup>b</sup><br>(11)   | 121.54±15.69 <sup>ac</sup><br>(15) | 98.86±11.84 <sup>c</sup><br>(15)   |
| 9S                | 151.22±8.04 <sup>a</sup><br>(12)  | 139.79±8.66 <sup>a</sup><br>(10)   | 153.98±7.15 <sup>a</sup><br>(16)   | 92.94±9.23 <sup>b</sup><br>(7)     |
| 9L                | 135.28±13.93 <sup>a</sup><br>(9)  | 120.17±12.77 <sup>ab</sup><br>(10) | 108.89±7.67 <sup>b</sup><br>(17)   | 121.75±10.24 <sup>ab</sup><br>(11) |
| 10L               | 144.48±8.29 <sup>a</sup><br>(14)  | 133.22±8.82 <sup>a</sup><br>(12)   | 136.37±7.38 <sup>a</sup><br>(14)   | 90.78±4.4 <sup>b</sup><br>(5)      |

This table contains each group's mean ± group standard deviation and the sample size, n, of each group in parenthesis (n). In superscript, linked to the standard deviation are letters "a", "b" and "c" which indicate groups not significantly different from each other at the p≤0.05 level. Dosage designations are as follows: Euploid plants (no B-A present)-E; Euploid plants (B-A present and failure of nondisjunction)-F; Hyperploid plants-H; Hypoploid plants-O

**Table S6 Replicate 2 plant height: mean, standard deviation, sample size, and significance groupings.**

| Chromosome<br>Arm | Plant Height                      |                                   |                                    |                                   |
|-------------------|-----------------------------------|-----------------------------------|------------------------------------|-----------------------------------|
|                   | E                                 | F                                 | H                                  | O                                 |
| 1S                | 139.23±15.21 <sup>a</sup><br>(14) | 138.07±14.07 <sup>a</sup><br>(20) | 111.94±7.98 <sup>b</sup><br>(14)   | 92.86±12.22 <sup>b</sup><br>(7)   |
| 1L                | 160.87±12.49 <sup>a</sup><br>(12) | 159.58±10.1 <sup>a</sup><br>(13)  | 116.11±14.64 <sup>b</sup><br>(8)   | 76.9±6.87 <sup>c</sup><br>(6)     |
| 3S                | 153.22±8.14 <sup>a</sup><br>(9)   | 153.59±8.54 <sup>a</sup><br>(15)  | 157.16±9.29 <sup>a</sup><br>(16)   | 156.59±7.82 <sup>a</sup><br>(11)  |
| 3L                | 150.94±9.41 <sup>a</sup><br>(12)  | 145.8±13.61 <sup>a</sup><br>(13)  | 135.2±7.91 <sup>a</sup><br>(12)    | 63±18.65 <sup>b</sup><br>(5)      |
| 4S                | 135.09±9.97 <sup>a</sup><br>(14)  | 137.4±6.51 <sup>a</sup><br>(11)   | 141.78±7.34 <sup>a</sup><br>(17)   | 129.49±15.61 <sup>a</sup><br>(10) |
| 4L                | 139.52±8.23 <sup>a</sup><br>(12)  | 144.9±10.21 <sup>a</sup><br>(15)  | 141.16±5.56 <sup>a</sup><br>(10)   | 88.03±7.83 <sup>b</sup><br>(15)   |
| 5S                | 155.07±11 <sup>a</sup><br>(13)    | 128.66±9.94 <sup>a</sup><br>(10)  | 122.96±9.44 <sup>a</sup><br>(14)   | 95.24±12.14 <sup>b</sup><br>(13)  |
| 5L                | 140.63±11.07 <sup>a</sup><br>(12) | 149.19±8.2 <sup>a</sup><br>(12)   | 138±12.41 <sup>a</sup><br>(8)      | 88.8±9.93 <sup>b</sup><br>(6)     |
| 6L                | 127.56±8.59 <sup>a</sup><br>(11)  | 137.35±6.6 <sup>a</sup><br>(8)    | 118.22±13.26 <sup>a</sup><br>(17)  | 101.39±11.45 <sup>b</sup><br>(16) |
| 7L                | 145.26±7.51 <sup>a</sup><br>(9)   | 152.33±9.38 <sup>a</sup><br>(11)  | 152.35±7.88 <sup>a</sup><br>(11)   | 91.18±8.44 <sup>b</sup><br>(10)   |
| 8L                | 143.16±9.85 <sup>a</sup><br>(13)  | 147.24±9.65 <sup>a</sup><br>(16)  | 126.01±15.33 <sup>ab</sup><br>(13) | 113.17±9.5 <sup>b</sup><br>(10)   |
| 9S                | 153.13±8.44 <sup>a</sup><br>(9)   | 149.79±7.63 <sup>a</sup><br>(15)  | 155.04±6.55 <sup>a</sup><br>(14)   | 104.57±10.83 <sup>b</sup><br>(15) |
| 9L                | 113.17±17.51 <sup>ab</sup><br>(6) | 127.62±16.13 <sup>b</sup><br>(9)  | 100.31±13.4 <sup>a</sup><br>(12)   | 99.31±14.42 <sup>a</sup><br>(17)  |
| 10L               | 123.1±13.41 <sup>a</sup><br>(12)  | 117.84±7.84 <sup>a</sup><br>(14)  | 123.84±9.51 <sup>a</sup><br>(14)   | 76.85±6.53 <sup>b</sup><br>(10)   |

This table contains each group's mean ± group standard deviation and the sample size, n, of each group in parenthesis (n). In superscript, linked to the standard deviation are letters "a", "b" and "c" which indicate groups not significantly different from each other at the p≤0.05 level. Dosage designations are as follows: Euploid plants (no B-A present)-E; Euploid plants (B-A present and failure of nondisjunction)-F; Hyperploid plants-H; Hypoploid plants-O

**Table S7 Replicate 1 ear height: mean, standard deviation, sample size, and significance groupings.**

| Chromosome<br>Arm | Ear Height                       |                                  |                                  |                                   |
|-------------------|----------------------------------|----------------------------------|----------------------------------|-----------------------------------|
|                   | E                                | F                                | H                                | O                                 |
| 1S                | 57.67±6.61 <sup>ab</sup><br>(7)  | 65.75±10.82 <sup>a</sup><br>(12) | 47.14±10.68 <sup>b</sup><br>(17) | 23.28±9.29 <sup>c</sup><br>(6)    |
| 1L                | 72.78±5.95 <sup>a</sup><br>(9)   | 69.44±8.19 <sup>a</sup><br>(14)  | 49.28±5.9 <sup>b</sup><br>(10)   | 24.13±4.1 <sup>c</sup><br>(4)     |
| 3S                | 70.69±13.56 <sup>a</sup><br>(8)  | 63.08±9.73 <sup>a</sup><br>(19)  | 68.36±5.01 <sup>a</sup><br>(16)  | 65.8±NA<br>(1)                    |
| 3L                | 54.03±10.27 <sup>a</sup><br>(9)  | 60.11±13.23 <sup>a</sup><br>(11) | 58.03±10.79 <sup>a</sup><br>(12) | 15.23±5.98 <sup>b</sup><br>(7)    |
| 4S                | 57.01±10.49 <sup>a</sup><br>(12) | 47.98±6.65 <sup>a</sup><br>(13)  | 48.44±6.89 <sup>a</sup><br>(13)  | 51.73±9.27 <sup>a</sup><br>(7)    |
| 4L                | 57.83±9.11 <sup>a</sup><br>(11)  | 59.95±9.56 <sup>a</sup><br>(14)  | 65.71±14.83 <sup>a</sup><br>(11) | 28.22±12.32 <sup>b</sup><br>(9)   |
| 5S                | 67.99±6.52 <sup>a</sup><br>(14)  | 67.67±10.82 <sup>a</sup><br>(13) | 57.23±8.75 <sup>ab</sup><br>(16) | 41.28±7.21 <sup>b</sup><br>(6)    |
| 5L                | 69.5±NA<br>(1)                   | 56.93±7.83 <sup>a</sup><br>(14)  | 56.63±6.08 <sup>a</sup><br>(21)  | 34.7±7.99 <sup>a</sup><br>(3)     |
| 6L                | 65.01±7.67 <sup>a</sup><br>(9)   | 61.42±5.13 <sup>a</sup><br>(9)   | 51.3±4.76 <sup>a</sup><br>(11)   | 32.73±4.44 <sup>b</sup><br>(15)   |
| 7L                | 54.1±16.72 <sup>a</sup><br>(8)   | 62.64±6.8 <sup>a</sup><br>(8)    | 61.89±9.9 <sup>a</sup><br>(11)   | 29.74±6.86 <sup>b</sup><br>(7)    |
| 8L                | 60.9±6.2 <sup>ab</sup><br>(7)    | 69.49±5.81 <sup>a</sup><br>(11)  | 44.43±9.2 <sup>b</sup><br>(15)   | 56.33±10.07 <sup>ab</sup><br>(15) |
| 9S                | 68.68±7.95 <sup>a</sup><br>(12)  | 59.83±6.47 <sup>ab</sup><br>(10) | 72.51±10.28 <sup>a</sup><br>(16) | 43.77±15.3 <sup>b</sup><br>(7)    |
| 9L                | 58.92±5.87 <sup>a</sup><br>(9)   | 52.08±7.24 <sup>a</sup><br>(10)  | 50.22±6.56 <sup>a</sup><br>(17)  | 42.05±6.9 <sup>a</sup><br>(11)    |
| 10L               | 69.21±5.53 <sup>a</sup><br>(13)  | 61.98±7.36 <sup>a</sup><br>(12)  | 62.84±4.88 <sup>a</sup><br>(14)  | 34.22±3.99 <sup>b</sup><br>(5)    |

This table contains each group's mean ± group standard deviation and the sample size, n, of each group in parenthesis (n). In superscript, linked to the standard deviation are letters "a", "b" and "c" which indicate groups not significantly different from each other at the p≤0.05 level. Dosage designations are as follows: Euploid plants (no B-A present)-E; Euploid plants (B-A present and failure of nondisjunction)-F; Hyperploid plants-H; Hypoploid plants-O

**Table S8 Replicate 2 ear height: mean, standard deviation, sample size, and significance groupings.**

| Chromosome<br>Arm | Ear Height                        |                                  |                                   |                                 |
|-------------------|-----------------------------------|----------------------------------|-----------------------------------|---------------------------------|
|                   | E                                 | F                                | H                                 | O                               |
| 1S                | 77.5±11.37 <sup>a</sup><br>(14)   | 73.33±16.32 <sup>a</sup><br>(20) | 54.79±12.73 <sup>b</sup><br>(14)  | 24.7±12.37 <sup>c</sup><br>(7)  |
| 1L                | 87.13±11.97 <sup>a</sup><br>(12)  | 89.85±12.19 <sup>a</sup><br>(13) | 59.06±6.35 <sup>b</sup><br>(8)    | 34.3±5.48 <sup>c</sup><br>(6)   |
| 3S                | 78.87±9.46 <sup>a</sup><br>(9)    | 73.29±13.24 <sup>a</sup><br>(15) | 70.77±9.96 <sup>a</sup><br>(16)   | 87.98±9.07 <sup>a</sup><br>(11) |
| 3L                | 72.04±7.8 <sup>a</sup><br>(12)    | 69.17±7.49 <sup>a</sup><br>(13)  | 66.26±20.19 <sup>a</sup><br>(12)  | 17.42±7.17 <sup>b</sup><br>(5)  |
| 4S                | 58.57±16.79 <sup>a</sup><br>(14)  | 57.1±7.7 <sup>a</sup><br>(11)    | 53.4±3.78 <sup>a</sup><br>(17)    | 70.43±9.68 <sup>a</sup><br>(10) |
| 4L                | 57.47±3.94 <sup>a</sup><br>(12)   | 65.61±6.22 <sup>a</sup><br>(15)  | 61.65±6.79 <sup>a</sup><br>(10)   | 31.73±5.47 <sup>b</sup><br>(15) |
| 5S                | 67.65±10.62 <sup>a</sup><br>(13)  | 58.23±12.85 <sup>a</sup><br>(10) | 64.39±9.96 <sup>a</sup><br>(14)   | 32.45±7.96 <sup>b</sup><br>(13) |
| 5L                | 57.02±11.33 <sup>ab</sup><br>(12) | 67.03±5.17 <sup>a</sup><br>(12)  | 59.44±7.95 <sup>a</sup><br>(8)    | 36.63±4.31 <sup>b</sup><br>(6)  |
| 6L                | 58.25±10.34 <sup>ab</sup><br>(11) | 65.4±5.54 <sup>a</sup><br>(8)    | 53.08±11.03 <sup>ab</sup><br>(17) | 42.55±9.16 <sup>b</sup><br>(16) |
| 7L                | 71.06±5.97 <sup>a</sup><br>(9)    | 69.09±7.51 <sup>a</sup><br>(11)  | 84.72±7.52 <sup>a</sup><br>(11)   | 33.65±5.09 <sup>b</sup><br>(10) |
| 8L                | 65.74±6.46 <sup>a</sup><br>(13)   | 66.45±8.59 <sup>a</sup><br>(17)  | 53.36±8.31 <sup>a</sup><br>(13)   | 61.38±6.41 <sup>a</sup><br>(10) |
| 9S                | 70.34±8.52 <sup>a</sup><br>(9)    | 76.9±10.05 <sup>ab</sup><br>(15) | 80.49±9.69 <sup>b</sup><br>(14)   | 40.55±7.36 <sup>c</sup><br>(15) |
| 9L                | 53.35±9.2 <sup>ab</sup><br>(6)    | 59.9±8.79 <sup>a</sup><br>(9)    | 51.03±5.31 <sup>a</sup><br>(12)   | 33.84±8.91 <sup>b</sup><br>(17) |
| 10L               | 57.89±10.28 <sup>a</sup><br>(12)  | 53.76±11.19 <sup>a</sup><br>(14) | 57.92±6.55 <sup>a</sup><br>(14)   | 30.4±5.61 <sup>b</sup><br>(10)  |

This table contains each group's mean ± group standard deviation and the sample size, n, of each group in parenthesis (n). In superscript, linked to the standard deviation are letters "a", "b" and "c" which indicate groups not significantly different from each other at the p≤0.05 level. Dosage designations are as follows: Euploid plants (no B-A present)-E; Euploid plants (B-A present and failure of nondisjunction)-F; Hyperploid plants-H; Hypoploid plants-O



**Table S9 Replicate 1 internode length: mean, standard deviation, sample size, and significance groupings.**

| Chromosome |                                 | Internode Length                |                                  |                                 |  |
|------------|---------------------------------|---------------------------------|----------------------------------|---------------------------------|--|
| Arm        | E                               | F                               | H                                | O                               |  |
| 1S         | 9.6±0.69 <sup>a</sup><br>(7)    | 10.74±1.16 <sup>a</sup><br>(12) | 8.91±1.06 <sup>a</sup><br>(17)   | 7.37±2.22 <sup>a</sup><br>(6)   |  |
| 1L         | 9.86±0.92 <sup>a</sup><br>(9)   | 10.23±1.56 <sup>a</sup><br>(14) | 9.76±1.62 <sup>a</sup><br>(10)   | 4.2±0.88 <sup>b</sup><br>(4)    |  |
| 3S         | 11.29±1.19 <sup>a</sup><br>(8)  | 10.96±1.04 <sup>a</sup><br>(19) | 11.41±0.73 <sup>a</sup><br>(16)  | 11.1±NA<br>(1)                  |  |
| 3L         | 11.86±1.31 <sup>a</sup><br>(9)  | 11.46±1.3 <sup>ab</sup><br>(11) | 9.29±2.23 <sup>b</sup><br>(12)   | 5.81±1.51 <sup>c</sup><br>(7)   |  |
| 4S         | 11.51±0.88 <sup>a</sup><br>(12) | 10.78±1.27 <sup>a</sup><br>(13) | 11.09±1.29 <sup>a</sup><br>(13)  | 10.2±1 <sup>a</sup><br>(7)      |  |
| 4L         | 10.39±1.04 <sup>a</sup><br>(11) | 10.82±1.15 <sup>a</sup><br>(14) | 11.05±0.46 <sup>a</sup><br>(11)  | 8.62±1.64 <sup>a</sup><br>(9)   |  |
| 5S         | 12.21±0.84 <sup>a</sup><br>(14) | 9.93±1.67 <sup>b</sup><br>(13)  | 8.54±1.54 <sup>b</sup><br>(16)   | 10.05±0.73 <sup>ab</sup><br>(6) |  |
| 5L         | 10.5±NA<br>(1)                  | 10.57±1.04 <sup>a</sup><br>(14) | 10.56±1.18 <sup>a</sup><br>(21)  | 9.83±1.18 <sup>a</sup><br>(3)   |  |
| 6L         | 9.99±0.7 <sup>ab</sup><br>(9)   | 11.04±0.8 <sup>ab</sup><br>(9)  | 11.77±2.49 <sup>a</sup><br>(11)  | 8.58±1.96 <sup>b</sup><br>(15)  |  |
| 7L         | 10.91±0.52 <sup>a</sup><br>(8)  | 10.81±1.37 <sup>a</sup><br>(8)  | 10.81±1.04 <sup>a</sup><br>(11)  | 8.39±1.11 <sup>a</sup><br>(7)   |  |
| 8L         | 11.49±1.45 <sup>ab</sup><br>(7) | 11.17±1.59 <sup>a</sup><br>(11) | 10.58±1.33 <sup>ab</sup><br>(15) | 8.76±2.55 <sup>b</sup><br>(15)  |  |
| 9S         | 12.03±1.37 <sup>a</sup><br>(12) | 11.59±1.22 <sup>a</sup><br>(10) | 12.68±1.02 <sup>a</sup><br>(16)  | 7.96±2.5 <sup>b</sup><br>(7)    |  |
| 9L         | 9.56±1.6 <sup>a</sup><br>(9)    | 8.6±1.06 <sup>a</sup><br>(10)   | 8.57±0.97 <sup>a</sup><br>(17)   | 9.85±0.79 <sup>a</sup><br>(11)  |  |
| 10L        | 12.32±0.99 <sup>a</sup><br>(13) | 10.8±0.95 <sup>ab</sup><br>(12) | 11.51±0.56 <sup>a</sup><br>(14)  | 8±0.72 <sup>b</sup><br>(5)      |  |

This table contains each group's mean ± group standard deviation and the sample size, n, of each group in parenthesis (n). In superscript, linked to the standard deviation are letters "a", "b" and "c" which indicate groups not significantly different from each other at the p≤0.05 level. Dosage designations are as follows: Euploid plants (no B-A present)-E; Euploid plants (B-A present and failure of nondisjunction)-F; Hyperploid plants-H; Hypoploid plants-O

**Table S10 Replicate 2 internode length: mean, standard deviation, sample size, and significance groupings.**

| Chromosome<br>Arm | Internode Length                |                                  |                                 |                                 |
|-------------------|---------------------------------|----------------------------------|---------------------------------|---------------------------------|
|                   | E                               | F                                | H                               | O                               |
| 1S                | 10.62±1.12 <sup>a</sup><br>(14) | 10.08±1.29 <sup>ab</sup><br>(20) | 8.66±1.17 <sup>b</sup><br>(14)  | 8.94±1.87 <sup>ab</sup><br>(7)  |
| 1L                | 11.7±1.72 <sup>a</sup><br>(12)  | 10.03±1.96 <sup>ab</sup><br>(13) | 8.94±1.39 <sup>bc</sup><br>(8)  | 6.27±2.6 <sup>c</sup><br>(6)    |
| 3S                | 11.61±1.18 <sup>a</sup><br>(9)  | 11.12±1.21 <sup>a</sup><br>(15)  | 12.54±0.91 <sup>a</sup><br>(16) | 11.4±1.08 <sup>a</sup><br>(11)  |
| 3L                | 11.68±0.66 <sup>a</sup><br>(12) | 11.65±1.1 <sup>a</sup><br>(13)   | 11.7±1.06 <sup>a</sup><br>(12)  | 4.66±2.12 <sup>b</sup><br>(5)   |
| 4S                | 11.21±1.15 <sup>a</sup><br>(14) | 11.85±1.05 <sup>a</sup><br>(11)  | 11.72±0.61 <sup>a</sup><br>(17) | 10.25±0.76 <sup>a</sup><br>(10) |
| 4L                | 10.21±0.7 <sup>ab</sup><br>(12) | 10.96±1.48 <sup>a</sup><br>(15)  | 10.7±0.64 <sup>ab</sup><br>(10) | 8.62±2.36 <sup>b</sup><br>(15)  |
| 5S                | 12.15±0.84 <sup>a</sup><br>(13) | 11.03±1.42 <sup>ab</sup><br>(10) | 9.89±1.76 <sup>b</sup><br>(14)  | 9.88±1.94 <sup>b</sup><br>(13)  |
| 5L                | 10.74±1.35 <sup>a</sup><br>(12) | 11.2±1.12 <sup>a</sup><br>(12)   | 10.95±1.04 <sup>a</sup><br>(8)  | 9.6±1.36 <sup>a</sup><br>(6)    |
| 6L                | 10.45±0.95 <sup>a</sup><br>(11) | 11±0.47 <sup>a</sup><br>(8)      | 9.39±1.51 <sup>a</sup><br>(17)  | 9.29±1.29 <sup>a</sup><br>(16)  |
| 7L                | 11.51±0.64 <sup>a</sup><br>(9)  | 11.15±1.02 <sup>a</sup><br>(11)  | 11.86±0.78 <sup>a</sup><br>(11) | 6.17±1.47 <sup>b</sup><br>(10)  |
| 8L                | 10.27±1.23 <sup>a</sup><br>(13) | 10.05±1.22 <sup>a</sup><br>(17)  | 9.54±1.08 <sup>ab</sup><br>(13) | 7.44±1.43 <sup>b</sup><br>(10)  |
| 9S                | 11.32±0.65 <sup>a</sup><br>(9)  | 11.27±0.86 <sup>a</sup><br>(15)  | 11.83±1.09 <sup>a</sup><br>(14) | 8.34±1.49 <sup>b</sup><br>(15)  |
| 9L                | 9.07±1.01 <sup>a</sup><br>(6)   | 10.23±0.72 <sup>a</sup><br>(9)   | 9±1.11 <sup>a</sup><br>(12)     | 8.01±1.28 <sup>a</sup><br>(17)  |
| 10L               | 10.57±1.02 <sup>a</sup><br>(12) | 9.91±1.32 <sup>a</sup><br>(14)   | 9.94±0.84 <sup>a</sup><br>(14)  | 7.31±1.02 <sup>b</sup><br>(10)  |

This table contains each group's mean ± group standard deviation and the sample size, n, of each group in parenthesis (n). In superscript, linked to the standard deviation are letters "a", "b" and "c" which indicate groups not significantly different from each other at the p≤0.05 level. Dosage designations are as follows: Euploid plants (no B-A present)-E; Euploid plants (B-A present and failure of nondisjunction)-F; Hyperploid plants-H; Hypoploid plants-O

**Table S11 Replicate 1 primary ear node circumference: mean, standard deviation, sample size, and significance groupings.**

| Chromosome<br>Arm | Primary Ear Node Circumference  |                                 |                                 |                                |
|-------------------|---------------------------------|---------------------------------|---------------------------------|--------------------------------|
|                   | E                               | F                               | H                               | O                              |
| 1S                | 8.49±1.9 <sup>a</sup><br>(7)    | 9.31±0.81 <sup>a</sup><br>(12)  | 7.54±1.42 <sup>a</sup><br>(17)  | 3.78±1.37 <sup>b</sup><br>(6)  |
| 1L                | 9.82±1.2 <sup>a</sup><br>(9)    | 9.26±1.18 <sup>ab</sup><br>(14) | 7.14±1.22 <sup>bc</sup><br>(10) | 3.68±1.42 <sup>c</sup><br>(4)  |
| 3S                | 8.76±2.09 <sup>a</sup><br>(8)   | 9.26±1.76 <sup>a</sup><br>(19)  | 9.66±0.86 <sup>a</sup><br>(16)  | 5.8±NA<br>(1)                  |
| 3L                | 9.19±1.47 <sup>a</sup><br>(9)   | 8.85±1.41 <sup>a</sup><br>(11)  | 7.58±1 <sup>ab</sup><br>(12)    | 5.07±1.64 <sup>b</sup><br>(7)  |
| 4S                | 9.33±0.39 <sup>a</sup><br>(12)  | 9±0.97 <sup>a</sup><br>(13)     | 9.13±1.08 <sup>a</sup><br>(13)  | 7.89±2.03 <sup>a</sup><br>(7)  |
| 4L                | 9.46±1.03 <sup>a</sup><br>(11)  | 9.46±1.02 <sup>a</sup><br>(14)  | 9.49±1.04 <sup>a</sup><br>(11)  | 5.77±0.88 <sup>b</sup><br>(9)  |
| 5S                | 9.88±0.63 <sup>a</sup><br>(14)  | 9.3±1.11 <sup>a</sup><br>(13)   | 9.26±1.4 <sup>a</sup><br>(16)   | 6.82±0.71 <sup>b</sup><br>(6)  |
| 5L                | 9.1±NA<br>(1)                   | 10.19±1.49 <sup>a</sup><br>(14) | 9.3±0.96 <sup>a</sup><br>(21)   | 7.33±0.95 <sup>a</sup><br>(3)  |
| 6L                | 8.7±1.59 <sup>a</sup><br>(9)    | 9.42±1 <sup>a</sup><br>(9)      | 8.3±0.38 <sup>a</sup><br>(11)   | 7.41±0.66 <sup>a</sup><br>(15) |
| 7L                | 9.3±0.89 <sup>a</sup><br>(8)    | 9.13±0.8 <sup>a</sup><br>(8)    | 8.58±0.86 <sup>ab</sup><br>(11) | 6.13±2.31 <sup>b</sup><br>(7)  |
| 8L                | 9.83±1.58 <sup>ab</sup><br>(7)  | 10.13±1 <sup>a</sup><br>(11)    | 7.69±0.89 <sup>b</sup><br>(15)  | 7.94±1.25 <sup>b</sup><br>(15) |
| 9S                | 10.13±1.19 <sup>a</sup><br>(12) | 9.5±1.2 <sup>a</sup><br>(10)    | 10.02±0.67 <sup>a</sup><br>(16) | 10.19±0.84 <sup>a</sup><br>(7) |
| 9L                | 9.57±1.16 <sup>a</sup><br>(9)   | 8.79±1.14 <sup>a</sup><br>(10)  | 9.34±1.51 <sup>a</sup><br>(16)  | 7.47±1.18 <sup>a</sup><br>(11) |
| 10L               | 9.76±0.74 <sup>a</sup><br>(13)  | 8.8±0.84 <sup>a</sup><br>(12)   | 8.59±0.34 <sup>a</sup><br>(14)  | 10.22±1.21 <sup>a</sup><br>(5) |

This table contains each group's mean ± group standard deviation and the sample size, n, of each group in parenthesis (n). In superscript, linked to the standard deviation are letters "a", "b" and "c" which indicate groups not significantly different from each other at the p≤0.05 level. Dosage designations are as follows: Euploid plants (no B-A present)-E; Euploid plants (B-A present and failure of nondisjunction)-F; Hyperploid plants-H; Hypoploid plants-O

**Table S12 Replicate 2 primary ear node circumference: mean, standard deviation, sample size, and significance groupings.**

| Chromosome<br>Arm | Primary Ear Node Circumference  |                                 |                                 |                                |
|-------------------|---------------------------------|---------------------------------|---------------------------------|--------------------------------|
|                   | E                               | F                               | H                               | O                              |
| 1S                | 8.64±1.31 <sup>a</sup><br>(14)  | 8.53±1.07 <sup>a</sup><br>(20)  | 7.81±1.04 <sup>a</sup><br>(14)  | 4.86±1.45 <sup>b</sup><br>(7)  |
| 1L                | 8.48±1.01 <sup>a</sup><br>(12)  | 8.47±1 <sup>a</sup><br>(13)     | 6.18±0.54 <sup>a</sup><br>(8)   | 6.48±2.84 <sup>a</sup><br>(6)  |
| 3S                | 9.56±1.18 <sup>ab</sup><br>(9)  | 9.31±1.29 <sup>ab</sup><br>(15) | 9.98±0.78 <sup>a</sup><br>(16)  | 8.17±0.54 <sup>b</sup><br>(11) |
| 3L                | 9.18±0.94 <sup>a</sup><br>(12)  | 8.79±1.01 <sup>a</sup><br>(13)  | 7.47±0.84 <sup>ab</sup><br>(12) | 4.46±1.19 <sup>b</sup><br>(5)  |
| 4S                | 9.09±0.7 <sup>a</sup><br>(14)   | 9.24±0.57 <sup>a</sup><br>(11)  | 9.39±0.54 <sup>a</sup><br>(17)  | 8.16±0.82 <sup>a</sup><br>(10) |
| 4L                | 10.06±0.48 <sup>a</sup><br>(12) | 9.57±1.14 <sup>a</sup><br>(15)  | 10±0.52 <sup>a</sup><br>(10)    | 6.37±0.79 <sup>b</sup><br>(15) |
| 5S                | 10.22±0.71 <sup>a</sup><br>(13) | 10.36±1.32 <sup>a</sup><br>(10) | 9.61±1.32 <sup>a</sup><br>(14)  | 6.48±1.16 <sup>b</sup><br>(13) |
| 5L                | 9.93±1.19 <sup>a</sup><br>(12)  | 9.81±0.76 <sup>a</sup><br>(12)  | 9.63±0.33 <sup>a</sup><br>(8)   | 5.98±2.02 <sup>b</sup><br>(6)  |
| 6L                | 7.95±0.89 <sup>a</sup><br>(11)  | 8.5±0.5 <sup>a</sup><br>(8)     | 7.61±0.84 <sup>a</sup><br>(17)  | 7.16±0.66 <sup>a</sup><br>(16) |
| 7L                | 8.67±0.9 <sup>a</sup><br>(9)    | 9.37±0.97 <sup>a</sup><br>(11)  | 8.47±0.53 <sup>a</sup><br>(11)  | 5.57±1.2 <sup>b</sup><br>(10)  |
| 8L                | 8.49±0.72 <sup>ab</sup><br>(13) | 8.79±1.37 <sup>a</sup><br>(17)  | 7.35±1.11 <sup>ab</sup><br>(13) | 7.11±1.68 <sup>b</sup><br>(10) |
| 9S                | 9.67±0.7 <sup>a</sup><br>(9)    | 9.4±0.9 <sup>a</sup><br>(15)    | 8.62±0.87 <sup>a</sup><br>(14)  | 8.74±1.37 <sup>a</sup><br>(15) |
| 9L                | 9.93±0.2 <sup>a</sup><br>(6)    | 9.24±0.91 <sup>a</sup><br>(9)   | 9.26±0.7 <sup>a</sup><br>(12)   | 6.16±1.26 <sup>b</sup><br>(17) |
| 10L               | 8.85±0.93 <sup>a</sup><br>(12)  | 7.72±0.88 <sup>a</sup><br>(14)  | 7.46±0.88 <sup>a</sup><br>(14)  | 8.74±1.03 <sup>a</sup><br>(10) |

This table contains each group's mean ± group standard deviation and the sample size, n, of each group in parenthesis (n). In superscript, linked to the standard deviation are letters "a", "b" and "c" which indicate groups not significantly different from each other at the p≤0.05 level. Dosage designations are as follows: Euploid plants (no B-A present)-E; Euploid plants (B-A present and failure of nondisjunction)-F; Hyperploid plants-H; Hypoploid plants-O

**Table S13 Replicate 1 tassel branch number: mean, standard deviation, sample size, and significance groupings.**

| Chromosome<br>Arm | Tassel Branch Number            |                                 |                                  |                                 |
|-------------------|---------------------------------|---------------------------------|----------------------------------|---------------------------------|
|                   | E                               | F                               | H                                | O                               |
| 1S                | 19.86±5.93 <sup>a</sup><br>(7)  | 21.3±5.12 <sup>a</sup><br>(10)  | 12.06±7.38 <sup>ab</sup><br>(17) | 2.83±1.94 <sup>b</sup><br>(6)   |
| 1L                | 16.88±2.95 <sup>a</sup><br>(8)  | 16.71±5.82 <sup>a</sup><br>(14) | 8.67±3.94 <sup>a</sup><br>(9)    | 8.25±5.68 <sup>a</sup><br>(4)   |
| 3S                | 18.63±6.07 <sup>a</sup><br>(8)  | 17.67±5.03 <sup>a</sup><br>(18) | 20±3.42 <sup>a</sup><br>(15)     | 6±NA<br>(1)                     |
| 3L                | 15.56±4.33 <sup>a</sup><br>(9)  | 15.55±5.75 <sup>a</sup><br>(11) | 15.75±1.48 <sup>a</sup><br>(12)  | 5.71±5.96 <sup>a</sup><br>(7)   |
| 4S                | 15.42±3.32 <sup>a</sup><br>(12) | 14.85±2.27 <sup>a</sup><br>(13) | 13.69±5.02 <sup>a</sup><br>(13)  | 13.86±4.06 <sup>a</sup><br>(7)  |
| 4L                | 20.09±3.36 <sup>a</sup><br>(11) | 18.29±6.37 <sup>a</sup><br>(14) | 14.64±8.86 <sup>ab</sup><br>(11) | 5.38±2.45 <sup>b</sup><br>(8)   |
| 5S                | 19.29±3.47 <sup>a</sup><br>(14) | 20.38±5.82 <sup>a</sup><br>(13) | 18.06±6.34 <sup>ab</sup><br>(16) | 7.67±2.58 <sup>b</sup><br>(6)   |
| 5L                | 12±NA<br>(1)                    | 12.71±6.02 <sup>a</sup><br>(14) | 13.05±2.07 <sup>a</sup><br>(19)  | 9.33±0.58 <sup>a</sup><br>(3)   |
| 6L                | 15±3.32 <sup>a</sup><br>(9)     | 10.89±6.92 <sup>a</sup><br>(9)  | 6.89±2.26 <sup>a</sup><br>(9)    | 14.6±4.17 <sup>a</sup><br>(15)  |
| 7L                | 14.63±4.96 <sup>a</sup><br>(8)  | 14.75±5.7 <sup>a</sup><br>(8)   | 18.82±3.92 <sup>a</sup><br>(11)  | 3.43±1.51 <sup>b</sup><br>(7)   |
| 8L                | 10±3.41 <sup>ab</sup><br>(6)    | 19.09±4.78 <sup>a</sup><br>(11) | 7.43±3.01 <sup>b</sup><br>(14)   | 19.71±5.28 <sup>a</sup><br>(14) |
| 9S                | 18.92±3.58 <sup>a</sup><br>(12) | 20.1±3.28 <sup>a</sup><br>(10)  | 19.5±4.05 <sup>a</sup><br>(16)   | 13.57±1.9 <sup>a</sup><br>(7)   |
| 9L                | 21.22±3.93 <sup>a</sup><br>(9)  | 15.3±4.03 <sup>a</sup><br>(10)  | 12.76±2.77 <sup>a</sup><br>(17)  | 20.9±6.4 <sup>a</sup><br>(10)   |
| 10L               | 19.77±4.28 <sup>a</sup><br>(13) | 17.11±4.57 <sup>a</sup><br>(9)  | 15.08±1.26 <sup>a</sup><br>(13)  | 19.6±5.86 <sup>a</sup><br>(5)   |

This table contains each group's mean ± group standard deviation and the sample size, n, of each group in parenthesis (n). In superscript, linked to the standard deviation are letters "a", "b" and "c" which indicate groups not significantly different from each other at the p≤0.05 level. Dosage designations are as follows: Euploid plants (no B-A present)-E; Euploid plants (B-A present and failure of nondisjunction)-F; Hyperploid plants-H; Hypoploid plants-O

**Table S14 Replicate 2 tassel branch number: mean, standard deviation, sample size, and significance groupings.**

| Chromosome<br>Arm | Tassel Branch Number            |                                 |                                  |                                 |
|-------------------|---------------------------------|---------------------------------|----------------------------------|---------------------------------|
|                   | E                               | F                               | H                                | O                               |
| 1S                | 16±3.59 <sup>ab</sup><br>(14)   | 17.3±4.43 <sup>a</sup><br>(20)  | 11.07±4.3 <sup>ab</sup><br>(14)  | 5.29±1.5 <sup>b</sup><br>(7)    |
| 1L                | 21.25±5.12 <sup>a</sup><br>(12) | 22.18±3.79 <sup>a</sup><br>(11) | 18±2.24 <sup>a</sup><br>(7)      | 15.67±3.83 <sup>a</sup><br>(6)  |
| 3S                | 21.71±5.15 <sup>a</sup><br>(7)  | 24±6.51 <sup>a</sup><br>(15)    | 25.8±4.63 <sup>a</sup><br>(15)   | 19.64±6.52 <sup>a</sup><br>(11) |
| 3L                | 20±4.43 <sup>a</sup><br>(12)    | 21.46±6.31 <sup>a</sup><br>(13) | 19.92±4.42 <sup>a</sup><br>(12)  | 2.8±2.49 <sup>b</sup><br>(5)    |
| 4S                | 16.5±3.06 <sup>a</sup><br>(14)  | 16.27±1.62 <sup>a</sup><br>(11) | 17.13±4.77 <sup>a</sup><br>(16)  | 17±4 <sup>a</sup><br>(10)       |
| 4L                | 21.55±3.64 <sup>a</sup><br>(11) | 23.92±4.37 <sup>a</sup><br>(13) | 23±2.83 <sup>a</sup><br>(9)      | 9.8±3.38 <sup>b</sup><br>(15)   |
| 5S                | 23±4.45 <sup>a</sup><br>(12)    | 22.3±9.45 <sup>a</sup><br>(10)  | 24.08±7.91 <sup>a</sup><br>(13)  | 4.62±1.56 <sup>b</sup><br>(13)  |
| 5L                | 18.33±5.02 <sup>a</sup><br>(12) | 20.83±5.29 <sup>a</sup><br>(12) | 16.63±3.58 <sup>a</sup><br>(8)   | 11.33±5.96 <sup>a</sup><br>(6)  |
| 6L                | 14.45±5.2 <sup>ab</sup><br>(11) | 17±4.57 <sup>ab</sup><br>(8)    | 8±3.87 <sup>a</sup><br>(15)      | 15.88±4.59 <sup>b</sup><br>(16) |
| 7L                | 18.14±4.49 <sup>a</sup><br>(7)  | 21.09±6.12 <sup>a</sup><br>(11) | 22.7±3.13 <sup>a</sup><br>(10)   | 14.3±4.24 <sup>a</sup><br>(10)  |
| 8L                | 16.54±4.68 <sup>a</sup><br>(13) | 20.69±6.94 <sup>a</sup><br>(16) | 15.27±5.12 <sup>a</sup><br>(11)  | 19.44±7.06 <sup>a</sup><br>(9)  |
| 9S                | 24.75±5.44 <sup>ab</sup><br>(8) | 22.79±4.76 <sup>a</sup><br>(14) | 20.93±6.98 <sup>ab</sup><br>(14) | 14±3.63 <sup>b</sup><br>(15)    |
| 9L                | 18.67±4.41 <sup>a</sup><br>(6)  | 17.22±5.19 <sup>a</sup><br>(9)  | 13.17±4.75 <sup>a</sup><br>(12)  | 12.06±5.88 <sup>a</sup><br>(17) |
| 10L               | 17.33±5.18 <sup>a</sup><br>(12) | 14.21±3.89 <sup>a</sup><br>(14) | 12.5±3.84 <sup>a</sup><br>(14)   | 13.4±3.63 <sup>a</sup><br>(10)  |

This table contains each group's mean ± group standard deviation and the sample size, n, of each group in parenthesis (n). In superscript, linked to the standard deviation are letters "a", "b" and "c" which indicate groups not significantly different from each other at the p≤0.05 level. Dosage designations are as follows: Euploid plants (no B-A present)-E; Euploid plants (B-A present and failure of nondisjunction)-F; Hyperploid plants-H; Hypoploid plants-O

**Table S15 Comparison of the data of this study with that of Lee *et al.* (1996).**

|    | Leaf Width |    | Leaf Length |    | Plant Height |    | Ear Height |    | Inter. Length |    | Ear Node Circum. |    | Tassel Branch No. |    |
|----|------------|----|-------------|----|--------------|----|------------|----|---------------|----|------------------|----|-------------------|----|
|    | dosage     |    | dosage      |    | dosage       |    | dosage     |    | dosage        |    | dosage           |    | dosage            |    |
|    | 1          | 3  | 1           | 3  | 1            | 3  | 1          | 3  | 1             | 3  | 1                | 3  | 1                 | 3  |
| 1S | **         | *  | **          | ns | **           | ** | **         | ** | **            | *  | **               | ns | **                | ns |
|    | --         | -- | --          | -- | --           | -- | --         | -- | --            | -- | --               | -- | --                | -- |
| 1L | **         | *  | **          | ns | **           | ** | **         | ** | **            | *  | ns               | ** | ns                | ns |
|    | --         | -- | --          | ns | --           | -- | --         | -- | --            | -- | --               | -- | --                | ns |
| 3S | ns         | ns | ns          | ns | ns           | ns | ns         | ns | ns            | ns | ns               | ns | ns                | ns |
|    | ns         | -- | --          | ns | ns           | -  | ns         | ns | -             | -  | -                | -  | --                | -  |
| 3L | **         | ** | **          | ns | **           | ns | **         | ns | **            | *  | **               | ns | **                | ns |
|    | --         | -  | --          | -  | --           | -  | --         | ns | --            | ns | --               | -- | --                | ns |
| 4S | ns         | ns | ns          | ns | ns           | ns | ns         | ns | ns            | ns | ns               | ns | ns                | ns |
|    | --         | -- | --          | -- | --           | -- | ns         | -- | --            | ns | -                | ns | ns                | ns |
| 4L | **         | ns | **          | ns | **           | ns | **         | ns | **            | ns | **               | ns | **                | ns |
|    | --         | -- | --          | ns | --           | -- | --         | ns | --            | ns | --               | ns | --                | ns |
| 5S | **         | ns | ns          | ns | **           | ** | **         | ns | *             | ** | **               | ns | **                | ns |
|    | --         | -  | --          | -- | --           | -- | --         | -- | ns            | -- | --               | -- | --                | ns |
| 5L | **         | ns | ns          | ns | **           | ns | **         | ns | ns            | ns | **               | ns | ns                | ns |
|    | --         | -- | --          | -- | --           | ns | --         | ns | --            | ns | --               | -- | --                | ns |
| 6L | **         | ns | **          | ** | **           | ns | **         | ns | ns            | ns | ns               | ns | ns                | ** |
|    | --         | ns | --          | -  | --           | -- | --         | -  | --            | -  | --               | -- | --                | ns |
| 7L | **         | ns | **          | ns | **           | ns | **         | ns | *             | ns | **               | ns | *                 | ns |
|    | --         | -- | --          | -- | --           | -  | --         | -  | --            | ns | --               | -- | ns                | ns |
| 8L | *          | *  | **          | ns | **           | ** | *          | ** | **            | ns | *                | ** | ns                | ** |
|    | ns         | -- | --          | -- | --           | -  | ns         | -- | --            | ns | --               | -- | ns                | -- |
| 9S | ns         | ns | *           | ns | **           | ns | ns         | *  | **            | ns | ns               | ns | *                 | ns |

|     |    |    |    |    |    |    |    |    |    |    |    |    |    |    |
|-----|----|----|----|----|----|----|----|----|----|----|----|----|----|----|
|     | -- | ni | -- | ni | ns | ni | -- | ni | -  | ni | -- | ni | -  | ni |
| 9L  | ** | ns | ** | ns | ** | *  | ** | ns | ns | ns | ** | ns | ns | ns |
|     | -- | ns | -- | -  | -- | -- | -- | -- | -- | -- | -- | -- | ns | ns |
| 10L | ns | *  | ns | ns | ** | ns | ** | ns | ** | ns | ns | ns | ns | ns |
|     | -  | -  | ns | -  | -- | ns | -- | ns | -- | ns | -  | ns | -- | ns |

An asterisk \* indicates that the mean value of the measured trait of plants with one dose or three doses of the chromosome arm were significantly lower than the value of the plants with two doses in the present study. \*P-value from 0.05 to 0.01; \*\* P-value 0.01 or less. (\*) the measured trait was significantly higher from 0.05 to 0.01. A dash - indicates the corresponding values for chromosome arm/trait measurements reported by Lee et al. (1996). -P-value from 0.05 to 0.01; -- P-value 0.01 or less; ns, the response was not significantly different from the 2-dose class; ni, the dosage class was not identified.
