# Supplementary material
Source: PubMed Central journal article supplement (PMC4174930)
Supplement: 609ddf61e97f405cf7fba1cac335b1da_genetics.114.166330-12.pdf [file 609ddf61e97f405cf7fba1cac335b1da_genetics.114.166330-12.pdf]

**Table S7 Replicate 1 ear height: mean, standard deviation, sample size, and significance groupings.**

| Chromosome<br>Arm | Ear Height                       |                                  |                                  |                                   |
|-------------------|----------------------------------|----------------------------------|----------------------------------|-----------------------------------|
|                   | E                                | F                                | H                                | O                                 |
| 1S                | 57.67±6.61 <sup>ab</sup><br>(7)  | 65.75±10.82 <sup>a</sup><br>(12) | 47.14±10.68 <sup>b</sup><br>(17) | 23.28±9.29 <sup>c</sup><br>(6)    |
| 1L                | 72.78±5.95 <sup>a</sup><br>(9)   | 69.44±8.19 <sup>a</sup><br>(14)  | 49.28±5.9 <sup>b</sup><br>(10)   | 24.13±4.1 <sup>c</sup><br>(4)     |
| 3S                | 70.69±13.56 <sup>a</sup><br>(8)  | 63.08±9.73 <sup>a</sup><br>(19)  | 68.36±5.01 <sup>a</sup><br>(16)  | 65.8±NA<br>(1)                    |
| 3L                | 54.03±10.27 <sup>a</sup><br>(9)  | 60.11±13.23 <sup>a</sup><br>(11) | 58.03±10.79 <sup>a</sup><br>(12) | 15.23±5.98 <sup>b</sup><br>(7)    |
| 4S                | 57.01±10.49 <sup>a</sup><br>(12) | 47.98±6.65 <sup>a</sup><br>(13)  | 48.44±6.89 <sup>a</sup><br>(13)  | 51.73±9.27 <sup>a</sup><br>(7)    |
| 4L                | 57.83±9.11 <sup>a</sup><br>(11)  | 59.95±9.56 <sup>a</sup><br>(14)  | 65.71±14.83 <sup>a</sup><br>(11) | 28.22±12.32 <sup>b</sup><br>(9)   |
| 5S                | 67.99±6.52 <sup>a</sup><br>(14)  | 67.67±10.82 <sup>a</sup><br>(13) | 57.23±8.75 <sup>ab</sup><br>(16) | 41.28±7.21 <sup>b</sup><br>(6)    |
| 5L                | 69.5±NA<br>(1)                   | 56.93±7.83 <sup>a</sup><br>(14)  | 56.63±6.08 <sup>a</sup><br>(21)  | 34.7±7.99 <sup>a</sup><br>(3)     |
| 6L                | 65.01±7.67 <sup>a</sup><br>(9)   | 61.42±5.13 <sup>a</sup><br>(9)   | 51.3±4.76 <sup>a</sup><br>(11)   | 32.73±4.44 <sup>b</sup><br>(15)   |
| 7L                | 54.1±16.72 <sup>a</sup><br>(8)   | 62.64±6.8 <sup>a</sup><br>(8)    | 61.89±9.9 <sup>a</sup><br>(11)   | 29.74±6.86 <sup>b</sup><br>(7)    |
| 8L                | 60.9±6.2 <sup>ab</sup><br>(7)    | 69.49±5.81 <sup>a</sup><br>(11)  | 44.43±9.2 <sup>b</sup><br>(15)   | 56.33±10.07 <sup>ab</sup><br>(15) |
| 9S                | 68.68±7.95 <sup>a</sup><br>(12)  | 59.83±6.47 <sup>ab</sup><br>(10) | 72.51±10.28 <sup>a</sup><br>(16) | 43.77±15.3 <sup>b</sup><br>(7)    |
| 9L                | 58.92±5.87 <sup>a</sup><br>(9)   | 52.08±7.24 <sup>a</sup><br>(10)  | 50.22±6.56 <sup>a</sup><br>(17)  | 42.05±6.9 <sup>a</sup><br>(11)    |
| 10L               | 69.21±5.53 <sup>a</sup><br>(13)  | 61.98±7.36 <sup>a</sup><br>(12)  | 62.84±4.88 <sup>a</sup><br>(14)  | 34.22±3.99 <sup>b</sup><br>(5)    |

This table contains each group's mean ± group standard deviation and the sample size, n, of each group in parenthesis (n). In superscript, linked to the standard deviation are letters "a", "b" and "c" which indicate groups not significantly different from each other at the p≤0.05 level. Dosage designations are as follows: Euploid plants (no B-A present)-E; Euploid plants (B-A present and failure of nondisjunction)-F; Hyperploid plants-H; Hypoploid plants-O
