# Supplementary material
Source: PubMed Central journal article supplement (PMC4174930)
Supplement: 684ee6a3d555f9b2e07eff6e891ebbd0_genetics.114.166330-7.pdf [file 684ee6a3d555f9b2e07eff6e891ebbd0_genetics.114.166330-7.pdf]

**Table S13 Replicate 1 tassel branch number: mean, standard deviation, sample size, and significance groupings.**

| Chromosome<br>Arm | Tassel Branch Number            |                                 |                                  |                                 |
|-------------------|---------------------------------|---------------------------------|----------------------------------|---------------------------------|
|                   | E                               | F                               | H                                | O                               |
| 1S                | 19.86±5.93 <sup>a</sup><br>(7)  | 21.3±5.12 <sup>a</sup><br>(10)  | 12.06±7.38 <sup>ab</sup><br>(17) | 2.83±1.94 <sup>b</sup><br>(6)   |
| 1L                | 16.88±2.95 <sup>a</sup><br>(8)  | 16.71±5.82 <sup>a</sup><br>(14) | 8.67±3.94 <sup>a</sup><br>(9)    | 8.25±5.68 <sup>a</sup><br>(4)   |
| 3S                | 18.63±6.07 <sup>a</sup><br>(8)  | 17.67±5.03 <sup>a</sup><br>(18) | 20±3.42 <sup>a</sup><br>(15)     | 6±NA<br>(1)                     |
| 3L                | 15.56±4.33 <sup>a</sup><br>(9)  | 15.55±5.75 <sup>a</sup><br>(11) | 15.75±1.48 <sup>a</sup><br>(12)  | 5.71±5.96 <sup>a</sup><br>(7)   |
| 4S                | 15.42±3.32 <sup>a</sup><br>(12) | 14.85±2.27 <sup>a</sup><br>(13) | 13.69±5.02 <sup>a</sup><br>(13)  | 13.86±4.06 <sup>a</sup><br>(7)  |
| 4L                | 20.09±3.36 <sup>a</sup><br>(11) | 18.29±6.37 <sup>a</sup><br>(14) | 14.64±8.86 <sup>ab</sup><br>(11) | 5.38±2.45 <sup>b</sup><br>(8)   |
| 5S                | 19.29±3.47 <sup>a</sup><br>(14) | 20.38±5.82 <sup>a</sup><br>(13) | 18.06±6.34 <sup>ab</sup><br>(16) | 7.67±2.58 <sup>b</sup><br>(6)   |
| 5L                | 12±NA<br>(1)                    | 12.71±6.02 <sup>a</sup><br>(14) | 13.05±2.07 <sup>a</sup><br>(19)  | 9.33±0.58 <sup>a</sup><br>(3)   |
| 6L                | 15±3.32 <sup>a</sup><br>(9)     | 10.89±6.92 <sup>a</sup><br>(9)  | 6.89±2.26 <sup>a</sup><br>(9)    | 14.6±4.17 <sup>a</sup><br>(15)  |
| 7L                | 14.63±4.96 <sup>a</sup><br>(8)  | 14.75±5.7 <sup>a</sup><br>(8)   | 18.82±3.92 <sup>a</sup><br>(11)  | 3.43±1.51 <sup>b</sup><br>(7)   |
| 8L                | 10±3.41 <sup>ab</sup><br>(6)    | 19.09±4.78 <sup>a</sup><br>(11) | 7.43±3.01 <sup>b</sup><br>(14)   | 19.71±5.28 <sup>a</sup><br>(14) |
| 9S                | 18.92±3.58 <sup>a</sup><br>(12) | 20.1±3.28 <sup>a</sup><br>(10)  | 19.5±4.05 <sup>a</sup><br>(16)   | 13.57±1.9 <sup>a</sup><br>(7)   |
| 9L                | 21.22±3.93 <sup>a</sup><br>(9)  | 15.3±4.03 <sup>a</sup><br>(10)  | 12.76±2.77 <sup>a</sup><br>(17)  | 20.9±6.4 <sup>a</sup><br>(10)   |
| 10L               | 19.77±4.28 <sup>a</sup><br>(13) | 17.11±4.57 <sup>a</sup><br>(9)  | 15.08±1.26 <sup>a</sup><br>(13)  | 19.6±5.86 <sup>a</sup><br>(5)   |

This table contains each group's mean ± group standard deviation and the sample size, n, of each group in parenthesis (n). In superscript, linked to the standard deviation are letters "a", "b" and "c" which indicate groups not significantly different from each other at the p≤0.05 level. Dosage designations are as follows: Euploid plants (no B-A present)-E; Euploid plants (B-A present and failure of nondisjunction)-F; Hyperploid plants-H; Hypoploid plants-O
