# Supplementary material
Source: PubMed Central journal article supplement (PMC4174930)
Supplement: 44055543144831950e585844cd04fa66_genetics.114.166330-9.pdf [file 44055543144831950e585844cd04fa66_genetics.114.166330-9.pdf]

**Table S11 Replicate 1 primary ear node circumference: mean, standard deviation, sample size, and significance groupings.**

| Chromosome<br>Arm | Primary Ear Node Circumference  |                                 |                                 |                                |
|-------------------|---------------------------------|---------------------------------|---------------------------------|--------------------------------|
|                   | E                               | F                               | H                               | O                              |
| 1S                | 8.49±1.9 <sup>a</sup><br>(7)    | 9.31±0.81 <sup>a</sup><br>(12)  | 7.54±1.42 <sup>a</sup><br>(17)  | 3.78±1.37 <sup>b</sup><br>(6)  |
| 1L                | 9.82±1.2 <sup>a</sup><br>(9)    | 9.26±1.18 <sup>ab</sup><br>(14) | 7.14±1.22 <sup>bc</sup><br>(10) | 3.68±1.42 <sup>c</sup><br>(4)  |
| 3S                | 8.76±2.09 <sup>a</sup><br>(8)   | 9.26±1.76 <sup>a</sup><br>(19)  | 9.66±0.86 <sup>a</sup><br>(16)  | 5.8±NA<br>(1)                  |
| 3L                | 9.19±1.47 <sup>a</sup><br>(9)   | 8.85±1.41 <sup>a</sup><br>(11)  | 7.58±1 <sup>ab</sup><br>(12)    | 5.07±1.64 <sup>b</sup><br>(7)  |
| 4S                | 9.33±0.39 <sup>a</sup><br>(12)  | 9±0.97 <sup>a</sup><br>(13)     | 9.13±1.08 <sup>a</sup><br>(13)  | 7.89±2.03 <sup>a</sup><br>(7)  |
| 4L                | 9.46±1.03 <sup>a</sup><br>(11)  | 9.46±1.02 <sup>a</sup><br>(14)  | 9.49±1.04 <sup>a</sup><br>(11)  | 5.77±0.88 <sup>b</sup><br>(9)  |
| 5S                | 9.88±0.63 <sup>a</sup><br>(14)  | 9.3±1.11 <sup>a</sup><br>(13)   | 9.26±1.4 <sup>a</sup><br>(16)   | 6.82±0.71 <sup>b</sup><br>(6)  |
| 5L                | 9.1±NA<br>(1)                   | 10.19±1.49 <sup>a</sup><br>(14) | 9.3±0.96 <sup>a</sup><br>(21)   | 7.33±0.95 <sup>a</sup><br>(3)  |
| 6L                | 8.7±1.59 <sup>a</sup><br>(9)    | 9.42±1 <sup>a</sup><br>(9)      | 8.3±0.38 <sup>a</sup><br>(11)   | 7.41±0.66 <sup>a</sup><br>(15) |
| 7L                | 9.3±0.89 <sup>a</sup><br>(8)    | 9.13±0.8 <sup>a</sup><br>(8)    | 8.58±0.86 <sup>ab</sup><br>(11) | 6.13±2.31 <sup>b</sup><br>(7)  |
| 8L                | 9.83±1.58 <sup>ab</sup><br>(7)  | 10.13±1 <sup>a</sup><br>(11)    | 7.69±0.89 <sup>b</sup><br>(15)  | 7.94±1.25 <sup>b</sup><br>(15) |
| 9S                | 10.13±1.19 <sup>a</sup><br>(12) | 9.5±1.2 <sup>a</sup><br>(10)    | 10.02±0.67 <sup>a</sup><br>(16) | 10.19±0.84 <sup>a</sup><br>(7) |
| 9L                | 9.57±1.16 <sup>a</sup><br>(9)   | 8.79±1.14 <sup>a</sup><br>(10)  | 9.34±1.51 <sup>a</sup><br>(16)  | 7.47±1.18 <sup>a</sup><br>(11) |
| 10L               | 9.76±0.74 <sup>a</sup><br>(13)  | 8.8±0.84 <sup>a</sup><br>(12)   | 8.59±0.34 <sup>a</sup><br>(14)  | 10.22±1.21 <sup>a</sup><br>(5) |

This table contains each group's mean ± group standard deviation and the sample size, n, of each group in parenthesis (n). In superscript, linked to the standard deviation are letters "a", "b" and "c" which indicate groups not significantly different from each other at the p≤0.05 level. Dosage designations are as follows: Euploid plants (no B-A present)-E; Euploid plants (B-A present and failure of nondisjunction)-F; Hyperploid plants-H; Hypoploid plants-O
