# Supplementary material
Source: PubMed Central journal article supplement (PMC4174930)
Supplement: c104dc42dbd4030968b1660985858326_genetics.114.166330-15.pdf [file c104dc42dbd4030968b1660985858326_genetics.114.166330-15.pdf]

**Table S5 Replicate 1 plant height: mean, standard deviation, sample size, and significance groupings.**

| Chromosome<br>Arm | Plant Height                      |                                    |                                    |                                    |
|-------------------|-----------------------------------|------------------------------------|------------------------------------|------------------------------------|
|                   | E                                 | F                                  | H                                  | O                                  |
| 1S                | 124.83±15.15 <sup>a</sup><br>(7)  | 138.45±10.24 <sup>a</sup><br>(12)  | 102.34±16.02 <sup>a</sup><br>(17)  | 64.52±15.82 <sup>b</sup><br>(6)    |
| 1L                | 143.7±3.65 <sup>a</sup><br>(9)    | 139.47±9.78 <sup>a</sup><br>(14)   | 106.82±11.75 <sup>b</sup><br>(10)  | 45.48±9.74 <sup>c</sup><br>(4)     |
| 3S                | 138.89±17.79 <sup>a</sup><br>(8)  | 134.08±9.85 <sup>a</sup><br>(19)   | 143.04±6.98 <sup>a</sup><br>(16)   | 118.4±NA<br>(1)                    |
| 3L                | 124.74±11.26 <sup>a</sup><br>(9)  | 132.01±15.19 <sup>a</sup><br>(11)  | 113.92±14.11 <sup>a</sup><br>(12)  | 60.7±15.03 <sup>b</sup><br>(7)     |
| 4S                | 134.91±13.27 <sup>a</sup><br>(12) | 127.16±10.96 <sup>a</sup><br>(13)  | 131.55±7.24 <sup>a</sup><br>(13)   | 113.71±15.56 <sup>a</sup><br>(7)   |
| 4L                | 131.11±13.18 <sup>a</sup><br>(11) | 137.34±14.48 <sup>a</sup><br>(14)  | 141.69±11.32 <sup>a</sup><br>(11)  | 82.82±14.75 <sup>b</sup><br>(9)    |
| 5S                | 156.18±7.34 <sup>a</sup><br>(14)  | 133.89±15.43 <sup>b</sup><br>(13)  | 115.24±7.17 <sup>b</sup><br>(16)   | 98.65±8.12 <sup>c</sup><br>(6)     |
| 5L                | 132.4±NA<br>(1)                   | 129.9±14.49 <sup>a</sup><br>(14)   | 126.16±7.52 <sup>a</sup><br>(21)   | 95.23±1.58 <sup>a</sup><br>(3)     |
| 6L                | 133.38±6.46 <sup>a</sup><br>(9)   | 130.14±7.76 <sup>a</sup><br>(9)    | 123.43±8.29 <sup>a</sup><br>(11)   | 85.53±14.69 <sup>b</sup><br>(15)   |
| 7L                | 134.61±15.27 <sup>a</sup><br>(8)  | 134.15±9.71 <sup>a</sup><br>(8)    | 131.99±12.31 <sup>a</sup><br>(11)  | 65.5±22.36 <sup>b</sup><br>(7)     |
| 8L                | 141.91±8.66 <sup>ab</sup><br>(7)  | 155.56±7.76 <sup>b</sup><br>(11)   | 121.54±15.69 <sup>ac</sup><br>(15) | 98.86±11.84 <sup>c</sup><br>(15)   |
| 9S                | 151.22±8.04 <sup>a</sup><br>(12)  | 139.79±8.66 <sup>a</sup><br>(10)   | 153.98±7.15 <sup>a</sup><br>(16)   | 92.94±9.23 <sup>b</sup><br>(7)     |
| 9L                | 135.28±13.93 <sup>a</sup><br>(9)  | 120.17±12.77 <sup>ab</sup><br>(10) | 108.89±7.67 <sup>b</sup><br>(17)   | 121.75±10.24 <sup>ab</sup><br>(11) |
| 10L               | 144.48±8.29 <sup>a</sup><br>(14)  | 133.22±8.82 <sup>a</sup><br>(12)   | 136.37±7.38 <sup>a</sup><br>(14)   | 90.78±4.4 <sup>b</sup><br>(5)      |

This table contains each group's mean ± group standard deviation and the sample size, n, of each group in parenthesis (n). In superscript, linked to the standard deviation are letters "a", "b" and "c" which indicate groups not significantly different from each other at the p≤0.05 level. Dosage designations are as follows: Euploid plants (no B-A present)-E; Euploid plants (B-A present and failure of nondisjunction)-F; Hyperploid plants-H; Hypoploid plants-O
