# Supplementary material
Source: PubMed Central journal article supplement (PMC4174930)
Supplement: c68541f477b0427185a613876b2a0cf2_genetics.114.166330-5.pdf [file c68541f477b0427185a613876b2a0cf2_genetics.114.166330-5.pdf]

**Table S15 Comparison of the data of this study with that of Lee *et al.* (1996).**

|    | Leaf Width |    | Leaf Length |    | Plant Height |    | Ear Height |    | Inter. Length |    | Ear Node Circum. |    | Tassel Branch No. |    |
|----|------------|----|-------------|----|--------------|----|------------|----|---------------|----|------------------|----|-------------------|----|
|    | dosage     |    | dosage      |    | dosage       |    | dosage     |    | dosage        |    | dosage           |    | dosage            |    |
|    | 1          | 3  | 1           | 3  | 1            | 3  | 1          | 3  | 1             | 3  | 1                | 3  | 1                 | 3  |
| 1S | **         | *  | **          | ns | **           | ** | **         | ** | **            | *  | **               | ns | **                | ns |
|    | --         | -- | --          | -- | --           | -- | --         | -- | --            | -- | --               | -- | --                | -- |
| 1L | **         | *  | **          | ns | **           | ** | **         | ** | **            | *  | ns               | ** | ns                | ns |
|    | --         | -- | --          | ns | --           | -- | --         | -- | --            | -- | --               | -- | --                | ns |
| 3S | ns         | ns | ns          | ns | ns           | ns | ns         | ns | ns            | ns | ns               | ns | ns                | ns |
|    | ns         | -- | --          | ns | ns           | -  | ns         | ns | -             | -  | -                | -  | --                | -  |
| 3L | **         | ** | **          | ns | **           | ns | **         | ns | **            | *  | **               | ns | **                | ns |
|    | --         | -  | --          | -  | --           | -  | --         | ns | --            | ns | --               | -- | --                | ns |
| 4S | ns         | ns | ns          | ns | ns           | ns | ns         | ns | ns            | ns | ns               | ns | ns                | ns |
|    | --         | -- | --          | -- | --           | -- | ns         | -- | --            | ns | -                | ns | ns                | ns |
| 4L | **         | ns | **          | ns | **           | ns | **         | ns | **            | ns | **               | ns | **                | ns |
|    | --         | -- | --          | ns | --           | -- | --         | ns | --            | ns | --               | ns | --                | ns |
| 5S | **         | ns | ns          | ns | **           | ** | **         | ns | *             | ** | **               | ns | **                | ns |
|    | --         | -  | --          | -- | --           | -- | --         | -- | ns            | -- | --               | -- | --                | ns |
| 5L | **         | ns | ns          | ns | **           | ns | **         | ns | ns            | ns | **               | ns | ns                | ns |
|    | --         | -- | --          | -- | --           | ns | --         | ns | --            | ns | --               | -- | --                | ns |
| 6L | **         | ns | **          | ** | **           | ns | **         | ns | ns            | ns | ns               | ns | ns                | ** |
|    | --         | ns | --          | -  | --           | -- | --         | -  | --            | -  | --               | -- | --                | ns |
| 7L | **         | ns | **          | ns | **           | ns | **         | ns | *             | ns | **               | ns | *                 | ns |
|    | --         | -- | --          | -- | --           | -  | --         | -  | --            | ns | --               | -- | ns                | ns |
| 8L | *          | *  | **          | ns | **           | ** | *          | ** | **            | ns | *                | ** | ns                | ** |
|    | ns         | -- | --          | -- | --           | -  | ns         | -- | --            | ns | --               | -- | ns                | -- |
| 9S | ns         | ns | *           | ns | **           | ns | ns         | *  | **            | ns | ns               | ns | *                 | ns |

|     |    |    |    |    |    |    |    |    |    |    |    |    |    |    |
|-----|----|----|----|----|----|----|----|----|----|----|----|----|----|----|
|     | -- | ni | -- | ni | ns | ni | -- | ni | -  | ni | -- | ni | -  | ni |
| 9L  | ** | ns | ** | ns | ** | *  | ** | ns | ns | ns | ** | ns | ns | ns |
|     | -- | ns | -- | -  | -- | -- | -- | -- | -- | -- | -- | -- | ns | ns |
| 10L | ns | *  | ns | ns | ** | ns | ** | ns | ** | ns | ns | ns | ns | ns |
|     | -  | -  | ns | -  | -- | ns | -- | ns | -- | ns | -  | ns | -- | ns |

An asterisk \* indicates that the mean value of the measured trait of plants with one dose or three doses of the chromosome arm were significantly lower than the value of the plants with two doses in the present study. \*P-value from 0.05 to 0.01; \*\* P-value 0.01 or less. (\*) the measured trait was significantly higher from 0.05 to 0.01. A dash - indicates the corresponding values for chromosome arm/trait measurements reported by Lee et al. (1996). -P-value from 0.05 to 0.01; -- P-value 0.01 or less; ns, the response was not significantly different from the 2-dose class; ni, the dosage class was not identified.
