# Supplementary material
Source: PubMed Central journal article supplement (PMC4174930)
Supplement: d42625b8dbc5aa53c250110256d0a947_genetics.114.166330-16.pdf [file d42625b8dbc5aa53c250110256d0a947_genetics.114.166330-16.pdf]

**Table S12 Replicate 2 primary ear node circumference: mean, standard deviation, sample size, and significance groupings.**

| Chromosome<br>Arm | Primary Ear Node Circumference  |                                 |                                 |                                |
|-------------------|---------------------------------|---------------------------------|---------------------------------|--------------------------------|
|                   | E                               | F                               | H                               | O                              |
| 1S                | 8.64±1.31 <sup>a</sup><br>(14)  | 8.53±1.07 <sup>a</sup><br>(20)  | 7.81±1.04 <sup>a</sup><br>(14)  | 4.86±1.45 <sup>b</sup><br>(7)  |
| 1L                | 8.48±1.01 <sup>a</sup><br>(12)  | 8.47±1 <sup>a</sup><br>(13)     | 6.18±0.54 <sup>a</sup><br>(8)   | 6.48±2.84 <sup>a</sup><br>(6)  |
| 3S                | 9.56±1.18 <sup>ab</sup><br>(9)  | 9.31±1.29 <sup>ab</sup><br>(15) | 9.98±0.78 <sup>a</sup><br>(16)  | 8.17±0.54 <sup>b</sup><br>(11) |
| 3L                | 9.18±0.94 <sup>a</sup><br>(12)  | 8.79±1.01 <sup>a</sup><br>(13)  | 7.47±0.84 <sup>ab</sup><br>(12) | 4.46±1.19 <sup>b</sup><br>(5)  |
| 4S                | 9.09±0.7 <sup>a</sup><br>(14)   | 9.24±0.57 <sup>a</sup><br>(11)  | 9.39±0.54 <sup>a</sup><br>(17)  | 8.16±0.82 <sup>a</sup><br>(10) |
| 4L                | 10.06±0.48 <sup>a</sup><br>(12) | 9.57±1.14 <sup>a</sup><br>(15)  | 10±0.52 <sup>a</sup><br>(10)    | 6.37±0.79 <sup>b</sup><br>(15) |
| 5S                | 10.22±0.71 <sup>a</sup><br>(13) | 10.36±1.32 <sup>a</sup><br>(10) | 9.61±1.32 <sup>a</sup><br>(14)  | 6.48±1.16 <sup>b</sup><br>(13) |
| 5L                | 9.93±1.19 <sup>a</sup><br>(12)  | 9.81±0.76 <sup>a</sup><br>(12)  | 9.63±0.33 <sup>a</sup><br>(8)   | 5.98±2.02 <sup>b</sup><br>(6)  |
| 6L                | 7.95±0.89 <sup>a</sup><br>(11)  | 8.5±0.5 <sup>a</sup><br>(8)     | 7.61±0.84 <sup>a</sup><br>(17)  | 7.16±0.66 <sup>a</sup><br>(16) |
| 7L                | 8.67±0.9 <sup>a</sup><br>(9)    | 9.37±0.97 <sup>a</sup><br>(11)  | 8.47±0.53 <sup>a</sup><br>(11)  | 5.57±1.2 <sup>b</sup><br>(10)  |
| 8L                | 8.49±0.72 <sup>ab</sup><br>(13) | 8.79±1.37 <sup>a</sup><br>(17)  | 7.35±1.11 <sup>ab</sup><br>(13) | 7.11±1.68 <sup>b</sup><br>(10) |
| 9S                | 9.67±0.7 <sup>a</sup><br>(9)    | 9.4±0.9 <sup>a</sup><br>(15)    | 8.62±0.87 <sup>a</sup><br>(14)  | 8.74±1.37 <sup>a</sup><br>(15) |
| 9L                | 9.93±0.2 <sup>a</sup><br>(6)    | 9.24±0.91 <sup>a</sup><br>(9)   | 9.26±0.7 <sup>a</sup><br>(12)   | 6.16±1.26 <sup>b</sup><br>(17) |
| 10L               | 8.85±0.93 <sup>a</sup><br>(12)  | 7.72±0.88 <sup>a</sup><br>(14)  | 7.46±0.88 <sup>a</sup><br>(14)  | 8.74±1.03 <sup>a</sup><br>(10) |

This table contains each group's mean ± group standard deviation and the sample size, n, of each group in parenthesis (n). In superscript, linked to the standard deviation are letters "a", "b" and "c" which indicate groups not significantly different from each other at the p≤0.05 level. Dosage designations are as follows: Euploid plants (no B-A present)-E; Euploid plants (B-A present and failure of nondisjunction)-F; Hyperploid plants-H; Hypoploid plants-O
