# Supplementary material
Source: PubMed Central journal article supplement (PMC4174930)
Supplement: e3a8062a0dcf36eb73bb47b2a131c23b_genetics.114.166330-3.pdf [file e3a8062a0dcf36eb73bb47b2a131c23b_genetics.114.166330-3.pdf]

**Table S10 Replicate 2 internode length: mean, standard deviation, sample size, and significance groupings.**

| Chromosome<br>Arm | Internode Length                |                                  |                                 |                                 |
|-------------------|---------------------------------|----------------------------------|---------------------------------|---------------------------------|
|                   | E                               | F                                | H                               | O                               |
| 1S                | 10.62±1.12 <sup>a</sup><br>(14) | 10.08±1.29 <sup>ab</sup><br>(20) | 8.66±1.17 <sup>b</sup><br>(14)  | 8.94±1.87 <sup>ab</sup><br>(7)  |
| 1L                | 11.7±1.72 <sup>a</sup><br>(12)  | 10.03±1.96 <sup>ab</sup><br>(13) | 8.94±1.39 <sup>bc</sup><br>(8)  | 6.27±2.6 <sup>c</sup><br>(6)    |
| 3S                | 11.61±1.18 <sup>a</sup><br>(9)  | 11.12±1.21 <sup>a</sup><br>(15)  | 12.54±0.91 <sup>a</sup><br>(16) | 11.4±1.08 <sup>a</sup><br>(11)  |
| 3L                | 11.68±0.66 <sup>a</sup><br>(12) | 11.65±1.1 <sup>a</sup><br>(13)   | 11.7±1.06 <sup>a</sup><br>(12)  | 4.66±2.12 <sup>b</sup><br>(5)   |
| 4S                | 11.21±1.15 <sup>a</sup><br>(14) | 11.85±1.05 <sup>a</sup><br>(11)  | 11.72±0.61 <sup>a</sup><br>(17) | 10.25±0.76 <sup>a</sup><br>(10) |
| 4L                | 10.21±0.7 <sup>ab</sup><br>(12) | 10.96±1.48 <sup>a</sup><br>(15)  | 10.7±0.64 <sup>ab</sup><br>(10) | 8.62±2.36 <sup>b</sup><br>(15)  |
| 5S                | 12.15±0.84 <sup>a</sup><br>(13) | 11.03±1.42 <sup>ab</sup><br>(10) | 9.89±1.76 <sup>b</sup><br>(14)  | 9.88±1.94 <sup>b</sup><br>(13)  |
| 5L                | 10.74±1.35 <sup>a</sup><br>(12) | 11.2±1.12 <sup>a</sup><br>(12)   | 10.95±1.04 <sup>a</sup><br>(8)  | 9.6±1.36 <sup>a</sup><br>(6)    |
| 6L                | 10.45±0.95 <sup>a</sup><br>(11) | 11±0.47 <sup>a</sup><br>(8)      | 9.39±1.51 <sup>a</sup><br>(17)  | 9.29±1.29 <sup>a</sup><br>(16)  |
| 7L                | 11.51±0.64 <sup>a</sup><br>(9)  | 11.15±1.02 <sup>a</sup><br>(11)  | 11.86±0.78 <sup>a</sup><br>(11) | 6.17±1.47 <sup>b</sup><br>(10)  |
| 8L                | 10.27±1.23 <sup>a</sup><br>(13) | 10.05±1.22 <sup>a</sup><br>(17)  | 9.54±1.08 <sup>ab</sup><br>(13) | 7.44±1.43 <sup>b</sup><br>(10)  |
| 9S                | 11.32±0.65 <sup>a</sup><br>(9)  | 11.27±0.86 <sup>a</sup><br>(15)  | 11.83±1.09 <sup>a</sup><br>(14) | 8.34±1.49 <sup>b</sup><br>(15)  |
| 9L                | 9.07±1.01 <sup>a</sup><br>(6)   | 10.23±0.72 <sup>a</sup><br>(9)   | 9±1.11 <sup>a</sup><br>(12)     | 8.01±1.28 <sup>a</sup><br>(17)  |
| 10L               | 10.57±1.02 <sup>a</sup><br>(12) | 9.91±1.32 <sup>a</sup><br>(14)   | 9.94±0.84 <sup>a</sup><br>(14)  | 7.31±1.02 <sup>b</sup><br>(10)  |

This table contains each group's mean ± group standard deviation and the sample size, n, of each group in parenthesis (n). In superscript, linked to the standard deviation are letters "a", "b" and "c" which indicate groups not significantly different from each other at the p≤0.05 level. Dosage designations are as follows: Euploid plants (no B-A present)-E; Euploid plants (B-A present and failure of nondisjunction)-F; Hyperploid plants-H; Hypoploid plants-O
