# Supplementary material
Source: PubMed Central journal article supplement (PMC4174930)
Supplement: e5d43263e9139c9759da77d94183e0dc_genetics.114.166330-1.pdf [file e5d43263e9139c9759da77d94183e0dc_genetics.114.166330-1.pdf]

**Table S3 Replicate 1 leaf length: mean, standard deviation, sample size, and significance groupings.**

| Chromosome<br>Arm | Leaf Length                     |                                 |                                  |                                 |
|-------------------|---------------------------------|---------------------------------|----------------------------------|---------------------------------|
|                   | E                               | F                               | H                                | O                               |
| 1S                | 55.32±3.84 <sup>ab</sup><br>(6) | 60.73±3.5 <sup>a</sup><br>(10)  | 52.07±5.61 <sup>ab</sup><br>(17) | 38.7±8.16 <sup>b</sup><br>(6)   |
| 1L                | 62.38±2.2 <sup>a</sup><br>(8)   | 59.58±6.75 <sup>a</sup><br>(12) | 55.19±10.7 <sup>a</sup><br>(8)   | 33.45±6.68 <sup>b</sup><br>(4)  |
| 3S                | 59.14±5.71 <sup>a</sup><br>(7)  | 59.88±6.41 <sup>a</sup><br>(18) | 60.78±4.23 <sup>a</sup><br>(16)  | 46.2±NA<br>(1)                  |
| 3L                | 54.25±4.72 <sup>a</sup><br>(8)  | 54.4±5.58 <sup>a</sup><br>(10)  | 46.08±4.77 <sup>ab</sup><br>(12) | 37.04±6.5 <sup>b</sup><br>(7)   |
| 4S                | 54.87±5.16 <sup>a</sup><br>(12) | 56.38±3.77 <sup>a</sup><br>(12) | 56.07±5.54 <sup>a</sup><br>(13)  | 55.29 ±7.4 <sup>a</sup><br>(7)  |
| 4L                | 60.48±6.44 <sup>a</sup><br>(11) | 60.57±3.86 <sup>a</sup><br>(13) | 63.5±3.49 <sup>a</sup><br>(11)   | 47.75±5.78 <sup>b</sup><br>(8)  |
| 5S                | 57.96±5.45 <sup>a</sup><br>(12) | 58.29±6.97 <sup>a</sup><br>(13) | 58.57±4.5 <sup>a</sup><br>(15)   | 51.77±4.54 <sup>a</sup><br>(6)  |
| 5L                | 55.5±NA<br>(1)                  | 58.79±4.7 <sup>a</sup><br>(14)  | 55.59±5.5 <sup>a</sup><br>(15)   | 53.53±3.61 <sup>a</sup><br>(3)  |
| 6L                | 53.09±4.48 <sup>a</sup><br>(9)  | 47.84±3.05 <sup>a</sup><br>(8)  | 50.96±12.61 <sup>a</sup><br>(11) | 44.25±4.3 <sup>a</sup><br>(15)  |
| 7L                | 54.96±6.21 <sup>a</sup><br>(7)  | 54.53±3.53 <sup>a</sup><br>(7)  | 54.98±6.33 <sup>a</sup><br>(11)  | 36.17±5.79 <sup>b</sup><br>(7)  |
| 8L                | 54.67±7.45 <sup>ab</sup><br>(7) | 59.64±6.92 <sup>a</sup><br>(10) | 54.62±6.96 <sup>ab</sup><br>(15) | 47.85±8.38 <sup>b</sup><br>(15) |
| 9S                | 61.2±2.12 <sup>a</sup><br>(8)   | 57.33±7.56 <sup>a</sup><br>(9)  | 60.17±5.75 <sup>a</sup><br>(15)  | 48.53±5.77 <sup>a</sup><br>(6)  |
| 9L                | 58.51±6.92 <sup>a</sup><br>(9)  | 59.43±4.15 <sup>a</sup><br>(10) | 60.36±5.45 <sup>a</sup><br>(17)  | 54.51±2.09 <sup>a</sup><br>(11) |
| 10L               | 62.63±3.32 <sup>a</sup><br>(7)  | 59.43±2.43 <sup>a</sup><br>(10) | 62.06±2.4 <sup>a</sup><br>(14)   | 57.33±8.92 <sup>a</sup><br>(4)  |

This table contains each group's mean ± group standard deviation and the sample size, n, of each group in parenthesis (n). In superscript, linked to the standard deviation are letters "a", "b" and "c" which indicate groups not significantly different from each other at the p≤0.05 level. Dosage designations are as follows: Euploid plants (no B-A present)-E; Euploid plants (B-A present and failure of nondisjunction)-F; Hyperploid plants-H; Hypoploid plants-O.
